# Supplementary material for: Raising awareness for dementia risk reduction through a public health campaign: a pre-post study
Source: PubMed Central journal article supplement — BMJ Open. 2020 Nov 6;10(11):e041211. doi: 10.1136/bmjopen-2020-041211 (PMC7651748; doi:10.1136/bmjopen-2020-041211), 2020-11-06
Supplement: bmjopen-2020-041211.draft_revisions.pdf [file bmjopen-2020-041211.draft_revisions.pdf]

# BMJ Open

BMJ Open is committed to open peer review. As part of this commitment we make the peer review history of every article we publish publicly available.

When an article is published we post the peer reviewers' comments and the authors' responses online. We also post the versions of the paper that were used during peer review. These are the versions that the peer review comments apply to.

The versions of the paper that follow are the versions that were submitted during the peer review process. They are not the versions of record or the final published versions. They should not be cited or distributed as the published version of this manuscript.

BMJ Open is an open access journal and the full, final, typeset and author-corrected version of record of the manuscript is available on our site with no access controls, subscription charges or pay-per-view fees (<http://bmjopen.bmj.com>).

If you have any questions on BMJ Open's open peer review process please email [info.bmjopen@bmj.com](mailto:info.bmjopen@bmj.com)

# BMJ Open

## Raising awareness for dementia risk reduction through a public health campaign: a pre-post study

|                               |                                                                                                                                                                                                                                                                                                                                                                                                                                                                                                                                                                   |
|-------------------------------|-------------------------------------------------------------------------------------------------------------------------------------------------------------------------------------------------------------------------------------------------------------------------------------------------------------------------------------------------------------------------------------------------------------------------------------------------------------------------------------------------------------------------------------------------------------------|
| Journal:                      | <i>BMJ Open</i>                                                                                                                                                                                                                                                                                                                                                                                                                                                                                                                                                   |
| Manuscript ID                 | bmjopen-2020-041211                                                                                                                                                                                                                                                                                                                                                                                                                                                                                                                                               |
| Article Type:                 | Original research                                                                                                                                                                                                                                                                                                                                                                                                                                                                                                                                                 |
| Date Submitted by the Author: | 04-Jun-2020                                                                                                                                                                                                                                                                                                                                                                                                                                                                                                                                                       |
| Complete List of Authors:     | Heger, Irene; Maastricht University, School for Mental Health and Neuroscience<br>Köhler , Sebastian ; Maastricht University, School for Mental Health and Neuroscience<br>van Boxtel, Martin; Maastricht University, School for Mental Health and Neuroscience<br>DeVugt, Marjolain; Maastricht University, School for Mental Health and Neuroscience<br>Hajema, KlaasJan; GGD Zuid-Limburg<br>Verhey, Frans; Maastricht University, School for Mental Health and Neuroscience<br>Deckers, Kay; Maastricht University, School for Mental Health and Neuroscience |
| Keywords:                     | Dementia < NEUROLOGY, PREVENTIVE MEDICINE, PUBLIC HEALTH                                                                                                                                                                                                                                                                                                                                                                                                                                                                                                          |
|                               |                                                                                                                                                                                                                                                                                                                                                                                                                                                                                                                                                                   |

SCHOLARONE™  
Manuscripts

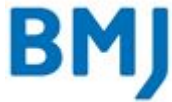

I, the Submitting Author has the right to grant and does grant on behalf of all authors of the Work (as defined in the below author licence), an exclusive licence and/or a non-exclusive licence for contributions from authors who are: i) UK Crown employees; ii) where BMJ has agreed a CC-BY licence shall apply, and/or iii) in accordance with the terms applicable for US Federal Government officers or employees acting as part of their official duties; on a worldwide, perpetual, irrevocable, royalty-free basis to BMJ Publishing Group Ltd ("BMJ") its licensees and where the relevant Journal is co-owned by BMJ to the co-owners of the Journal, to publish the Work in this journal and any other BMJ products and to exploit all rights, as set out in our [licence](#).

The Submitting Author accepts and understands that any supply made under these terms is made by BMJ to the Submitting Author unless you are acting as an employee on behalf of your employer or a postgraduate student of an affiliated institution which is paying any applicable article publishing charge ("APC") for Open Access articles. Where the Submitting Author wishes to make the Work available on an Open Access basis (and intends to pay the relevant APC), the terms of reuse of such Open Access shall be governed by a Creative Commons licence – details of these licences and which [Creative Commons](#) licence will apply to this Work are set out in our licence referred to above.

Other than as permitted in any relevant BMJ Author's Self Archiving Policies, I confirm this Work has not been accepted for publication elsewhere, is not being considered for publication elsewhere and does not duplicate material already published. I confirm all authors consent to publication of this Work and authorise the granting of this licence.

1  
2  
3 **Raising awareness for dementia risk reduction through a public health**  
4  
5  
6 **campaign: a pre-post study**  
7

8 Irene Heger<sup>a\*</sup>, MSc, Sebastian Köhler<sup>a</sup>, PhD, Martin van Boxtel<sup>a</sup>, PhD, Marjolein de Vugt<sup>a</sup>, PhD,  
9  
10 KlaasJan Hajema<sup>b</sup>, PhD, Frans Verhey<sup>a</sup>, PhD, Kay Deckers<sup>a</sup>, PhD

11  
12  
13 <sup>a</sup> Alzheimer Centre Limburg, School for Mental Health and Neuroscience, Maastricht University, Postbus  
14  
15 616, 6200 MD Maastricht, the Netherlands

16  
17  
18 <sup>b</sup> GGD Zuid-Limburg, Postbus 33, 6400 AA Heerlen, the Netherlands

19  
20  
21  
22  
23  
24 Word count abstract / manuscript: 295 / 3,223

25  
26  
27 IH: [irene.heger@maastrichtuniversity.nl](mailto:irene.heger@maastrichtuniversity.nl)

28  
29  
30 SK: [s.koehler@maastrichtuniversity.nl](mailto:s.koehler@maastrichtuniversity.nl)

31  
32  
33 MvB: [martin.vanboxtel@maastrichtuniversity.nl](mailto:martin.vanboxtel@maastrichtuniversity.nl)

34  
35  
36 MdV: [m.devugt@maastrichtuniversity.nl](mailto:m.devugt@maastrichtuniversity.nl)

37  
38  
39 KH: [KlaasJan.Hajema@ggdzl.nl](mailto:KlaasJan.Hajema@ggdzl.nl)

40  
41  
42 FV: [f.verhey@maastrichtuniversity.nl](mailto:f.verhey@maastrichtuniversity.nl)

43  
44  
45 KD: [kay.deckers@maastrichtuniversity.nl](mailto:kay.deckers@maastrichtuniversity.nl)

46  
47  
48 \* Corresponding author

49  
50  
51 E-mail address: [irene.heger@maastrichtuniversity.nl](mailto:irene.heger@maastrichtuniversity.nl)

52  
53  
54 Telephone number: +31 43 - 38841043

55  
56  
57 Postal address: Universiteitssingel 40, 6229 ER Maastricht, the Netherlands.

## Abstract

**Objectives:** Evaluate the effect of a health promotion campaign aimed at increasing awareness about dementia risk reduction in middle-aged community-dwelling individuals in the Netherlands.

**Design:** A 10-month public health campaign using mass-media and community participation, supported by eHealth. Population-level difference in awareness before and after the campaign, including variation between demographic groups, was assessed in two independent cross-sectional samples from the same target population.

**Setting:** The public health campaign was launched in the Province of Limburg, the Netherlands, targeting all inhabitants aged 40 to 75 years old. Three specific districts within the Province were chosen for an additional community-participation approach, in which local stakeholders were invited to support the campaign.

**Results:** No pre-post difference was observed in people agreeing to the statement that dementia risk reduction is possible ( $\chi^2(1) = 1.27, p = 0.260$ ). For the individual lifestyle factors, physical activity (7.6% increase ( $\chi^2(1) = 7.48, p \leq 0.01$ )) and health diet (10.5% increase ( $\chi^2(1) = 12.37, p \leq 0.001$ )) were identified more often post-campaign. The protective factor cognitive activity was identified most often as being protective against dementia at both pre- (79.4%) and post-assessment (80.4%), but there was no increase in awareness ( $\chi^2(1) = 0.17, p = 0.677$ ). Self-reported exposure to the campaign was associated with more awareness and more motivation for behavioral change ( $\chi^2(1) = 6.52, p \leq 0.05$ ). Compared to mass media only, the addition of community-participation resulted in better recognition of campaign-material and the eHealth-platform.

**Conclusions:** This study was not able to reach a population-level increase of awareness of dementia risk reduction. Two out of the three lifestyle factors that formed the foundation of the campaign were identified more often post-campaign. Those reported having been exposed to the campaign were more aware and more inclined towards behavioral change.

### Strengths and limitations of this study

- This study used extensive pre- and post-campaign surveys, with large independent samples from the same target population and comparable methodology.
- The public health campaign was designed in consultation with health promotion experts (i.e. municipal health services, department of Health Promotion of Maastricht University, the Netherlands) and had a flexible design that made it possible to include local stakeholders during the campaign and alter strategies along the way.
- A positive approach was chosen for this health promotion campaign, for example by using the words “brain health” and “room for improvement” to raise awareness of dementia risk reduction, instead of focusing on unhealthy behaviors that increase the risk of dementia.
- The samples were drawn from people from a previous survey study who indicated to be interested in future research, which could have led to a pre-selection of people interested in scientific research and health and therefore could have led to selection bias (e.g. an overestimation of dementia risk reduction literacy).
- The reach and effect of the campaign was limited due to restrained resources of the research team to reach out to relevant stakeholders and due to a limited budget to cover (mass) media costs (e.g. advertisement in newspapers, billboards).

## 1. Introduction

Dementia is characterized by progressive decline of cognitive abilities, leading to inferences in daily living. Alzheimer's disease (AD) and vascular dementia are the most common underlying pathologies, and often co-exist.<sup>1</sup> Due to the aging population, the number of people living with dementia worldwide is expected to triple from 50 million in 2018 to 152 million in 2050.<sup>2</sup> This rapid global increase and the absence of a curative treatment exposes a major public health concern.

Primary prevention of dementia through lifestyle modification gains increasing attention in research and policy.<sup>1,3-5</sup> Population-based estimations showed that around one-third of all dementia cases might be attributable to seven lifestyle and health-related factors, including physical inactivity, depression, and low mental stimulation.<sup>4</sup> Reducing exposure to these risk factors by 10 to 20% per decade would lower the prevalence of AD by as much as 8 to 15%.<sup>4</sup> These insights have led to a series of randomized controlled trials (RCTs), using lifestyle interventions to delay or prevent cognitive decline and dementia onset.<sup>6-9</sup> The multidomain Prevention of Dementia by Intensive Vascular Care (preDIVA) trial, in 3,454 patients with known vascular risk factors aged 70-79 years, and the Multidomain Alzheimer Preventive Trial (MAPT) in 1,680 adults aged 70 years and older did both not result in significant reduction of incident dementia<sup>7</sup> and change in memory function,<sup>8</sup> or only in subgroups. In contrast, the population-based Finnish Geriatric Intervention Study to Prevent Cognitive Impairment and Disability (FINGER), starting earlier in those aged 60-77 years, was the first large-scale RCT that showed beneficial effects on cognition.<sup>6,10</sup> It seems that dementia risk reduction interventions should target people in midlife to minimize lifetime accumulation of risk factor exposure and consequent brain pathology.<sup>1,11-13</sup>

Recently, a global initiative aimed at harmonizing intervention studies on risk factor modification was launched, called World Wide (WW) FINGERS.<sup>11</sup> Incorporated trials include the US Study to Protect Brain Health Through Lifestyle Intervention to Reduce Risk (US POINTER) and the Singapore intervention study to prevent cognitive impairment and disability (SINGER).<sup>11</sup> The ambition of WW-

1  
2  
3 FINGERS to find robust evidence for lifestyle interventions that delay or prevent dementia onset is  
4 promising from a public health perspective. In addition, epidemiological studies have shown decreasing  
5 incidence of dementia in high-income countries, observed in several cohorts<sup>14-16</sup>, probably because of  
6 improved cardiovascular health, nutrition and education over the last decades.<sup>2</sup> The timeliness of  
7 dementia prevention interventions was also emphasized by the Lancet Commission on Prevention,  
8 Intervention and Care of 2017<sup>1</sup> and the publication of guidelines for risk reduction of cognitive decline  
9 and dementia by the World Health Organization (WHO) in 2019.<sup>5</sup>

10  
11  
12  
13  
14  
15  
16  
17  
18 It must, however, be noted that the general public is still largely unaware of the potential of dementia risk  
19 reduction, let alone of specific actions to reduce dementia risk.<sup>17-19</sup> In our own survey among middle-aged  
20 adults (n=590), 44% were aware of dementia risk reduction, and only 20-25% considered vascular  
21 conditions to increase the risk.<sup>17</sup> Hence, despite the need for conclusive RCTs, little is known about how  
22 knowledge can be translated to the general public to raise awareness, and how to engage hard-to-reach  
23 subgroups (e.g. low health literacy or socioeconomic status) who are often underrepresented in clinical  
24 trials, too.<sup>20-22</sup>

25  
26  
27  
28  
29  
30  
31  
32  
33  
34 Creating risk awareness at the population level is a crucial first step before behaviour-change programs  
35 can be developed and implemented. Therefore, the goal of this study is to evaluate the impact of a health  
36 promotion campaign aimed at increasing awareness about dementia risk reduction in middle-aged Dutch  
37 community-dwelling individuals. Specifically, we tested change in the level of awareness at the  
38 population-level before and after the campaign, variation between demographic groups, the effect of  
39 different approaches (mass media versus additional community-participation) and the use of eHealth  
40 supportive technology, in order to distil the lessons learned for future campaigns and policies.

## 41 42 43 44 45 46 47 48 49 50 **2. Methods**

### 51 52 53 *Target population*



1  
2  
3 The target population were inhabitants of the Province of Limburg, the Netherlands, aged 40 to 75 years  
4 old (558.535 people in total<sup>23</sup>). The Ethics Review Committee Psychology and Neuroscience (ERCPN) of  
5 Maastricht University approved this study (reference number 177-07-03-2017). All participants received  
6 an information letter and signed a digital informed consent form prior to participation.  
7  
8  
9  
10

### 11 12 *Awareness campaign*

13  
14  
15 The primary aim of this campaign (March 2018 – January 2019) was to increase awareness on dementia  
16 risk reduction. Secondary, we aimed to motivate people for behavioural change by means of eHealth. The  
17 campaign was developed by the Alzheimer Centre Limburg (ACL) at Maastricht University and  
18 Maastricht University Medical Centre+, in consultation with the Dutch Municipal Health Services (MHS)  
19 and the Department of Health Promotion of Maastricht University. An agency for strategy and design  
20 developed the campaign materials and website.<sup>24</sup> To maximize acceptance in the relatively young target  
21 population, a positive phrasing was chosen with respect to the slogan (“We are our own medicine”),  
22 terminology (e.g. “brain health” rather than “dementia”), and campaign material visualizing the three  
23 campaign themes: “eat healthy”, “exercise regularly”, and “stay curious” (see Supplemental File 1 for  
24 examples). The campaign materials were discussed with stakeholders (Dutch Alzheimer’s Association  
25 and an evaluation panel of potential end-users). Two different campaign approaches were chosen in order  
26 to compare the outcome. A broad campaign was launched, targeting the public via mass media such as  
27 newspapers and social media (hereafter “population sample”). Three specific districts within the Province  
28 (Landgraaf-Schaesberg, Brunssum-Oost, and Roermond-Hoogvonderen) were chosen for a community-  
29 participation approach, in which local stakeholders (e.g. municipality, supermarkets) were invited to  
30 support the campaign (hereafter “district sample”). The district samples were chosen based on variation in  
31 socio-economic status and absence of other public health projects.  
32  
33  
34  
35  
36  
37  
38  
39  
40  
41  
42  
43  
44  
45  
46  
47  
48  
49  
50

### 51 52 *The eHealth platform*

1  
2  
3 An online platform called *MijnBreincoach* (“MyBraincoach”) was developed together with two software  
4 companies and made available as mobile app and web portal <sup>25</sup>. It uses the well-validated Lifestyle for  
5 BRAin Health (LIBRA) score.<sup>12,13,26</sup> This predictive model consists of twelve modifiable risk and  
6 protective factors for dementia (e.g. smoking, physical inactivity, depression), and gives people insight  
7 into their personal dementia risk profile. Detailed information can be found in Supplemental File 2.  
8  
9  
10  
11  
12

### 13 14 *Pre- and post-campaign surveys*

15  
16  
17 Two cross-sectional surveys were performed: one pre-campaign (September 2017 <sup>17</sup>) and one post-  
18 campaign (February 2019). The pre- and post-campaign surveys took place in independent samples, in  
19 order to ensure that the potential increase in awareness was not caused by learning effects. The  
20 methodology and results of the pre-campaign survey have been described in more detail elsewhere.<sup>17</sup>  
21  
22  
23  
24  
25

### 26 27 *Recruitment process*

28  
29 The population samples were drawn by the MHS from participants of a previous national health survey  
30 (‘*Gezondheidsmonitor 2016*’) who had agreed to be contacted for future studies. A random selection of  
31 people (40-75 years) was invited to participate via email. The district samples were drawn from the  
32 municipal registry by the municipality or by the MHS, based on ZIP-codes and age and received a postal  
33 letter.  
34  
35  
36  
37  
38  
39  
40

### 41 42 *Measurements*

43  
44 Age, sex, marital status, educational level, self-reported knowledge of dementia and dementia risk  
45 reduction were assessed both at the pre- and post-assessment. Ten items from the British Social Attitudes  
46 (BSA) survey<sup>18</sup> were used, translated into Dutch. To assess all twelve factors from the LIBRA-index,<sup>26</sup>  
47 custom-made items were included. The post-campaign survey included additional items concerning  
48 exposure to the campaign (e.g. asking participants whether they recognized campaign material). The  
49 items on exposure to the campaign were placed after the items assessing awareness, thereby not  
50  
51  
52  
53  
54  
55  
56  
57  
58  
59  
60

1  
2  
3 influencing one's perspective on the possibility of dementia risk reduction. Our primary outcome was the  
4 difference between pre- and post-assessment in the proportion of people rejecting the statement 'There is  
5 nothing I can do to reduce my dementia risk'. We presented this statement in the Results section in a  
6 positive form ("dementia risk reduction is possible"). Secondary outcomes were changes in endorsement  
7 of the three campaign themes physical activity, cognitive activity and healthy diet.  
8  
9  
10  
11  
12

### 13 14 *Statistical analyses*

15  
16  
17 Independent groups *t*-tests and  $\chi^2$  tests were used to analyse differences between the pre- and post-  
18 campaign samples, and between population and district samples, and to investigate differences in the  
19 relation between socio-demographic variables and level of awareness and knowledge of risk and  
20 protective factors. Analyses were performed in Stata 13.1 (StataCorp, College Station, TX, USA), with  
21 the level of significance set at  $p \leq 0.05$  in two-tailed tests.  
22  
23  
24  
25  
26  
27

### 28 29 *Patient and Public Involvement*

30  
31  
32 There were no patients involved in this research. Members of the public were involved in the design and  
33 rollout of the public health campaign.  
34  
35  
36

### 37 38 *Data sharing statement*

39  
40 The dataset and statistical code are available upon reasonable request. No additional data available.  
41  
42

## 43 **3. Results**

### 44 45 *Demographics*

46  
47  
48 The response rates of the pre- and post-campaign surveys were highly comparable (population pre-  
49 campaign 53.6%, post-campaign 54.8%; district pre-campaign 33.2%, post-campaign 32.2%). See  
50 Supplemental File 3, 4a and 4b for flowcharts of the recruitment process. Table 1 shows the  
51 characteristics of the total and the two separate samples. The characteristics of the districts can be found  
52  
53  
54  
55  
56  
57

1  
2  
3 in Supplemental File 5. The total pre-assessment sample was highly comparable with the total post-  
4 assessment sample. As expected by design, the population sample was higher educated than the district  
5 sample at the pre- ( $\chi^2(2) = 29.57, p \leq 0.001$ ) and post-assessment ( $\chi^2(2) = 17.41, p \leq 0.001$ ). An  
6 overview of the main campaign expressions are displayed in Box 1.  
7  
8  
9  
10  
11  
12  
13  
14  
15  
16  
17  
18  
19  
20  
21  
22  
23  
24  
25  
26  
27  
28  
29  
30  
31  
32  
33  
34  
35  
36  
37  
38  
39  
40  
41  
42  
43  
44  
45  
46  
47  
48  
49  
50  
51  
52  
53  
54  
55  
56  
57  
58  
59  
60

For peer review only

**Table 1. Characteristics of the two cross-sectional samples before and after the campaign, stratified by sampling frame (population and district sample).**

| Variables*               | Total sample (n = 1,192)  |                                |             | Population sample (n =780)    |                                |             | District sample (n =412) |                               |             |
|--------------------------|---------------------------|--------------------------------|-------------|-------------------------------|--------------------------------|-------------|--------------------------|-------------------------------|-------------|
|                          | Pre-campaign<br>(n = 590) | Post-<br>campaign<br>(n = 602) | p-<br>value | Pre-<br>campaign<br>(n = 381) | Post-<br>campaign<br>(n = 399) | p-<br>value | Pre-campaign<br>(n= 209) | Post-<br>campaign<br>(n= 203) | p-<br>value |
| Age, mean (SD)           | 60.7 (8.8)                | 59.9 (8.8)                     | 0.113       | 61.1 (8.9)                    | 61.2 (8.8)                     | 0.869       | 60.1 (8.6)               | 57.4 (8.3)                    | ≤ 0.01      |
| Age group (years), n (%) |                           |                                | 0.755       |                               |                                | 0.649       |                          |                               | 0.060       |
| 40 – 49                  | 75 (13.0%)                | 91 (15.2%)                     |             | 48 (12.9%)                    | 52 (13.2%)                     |             | 27 (13.2%)               | 39 (19.2%)                    |             |
| 50 – 59                  | 170 (29.5%)               | 172 (28.8%)                    |             | 101 (27.1%)                   | 95 (24.1%)                     |             | 69 (33.8%)               | 77 (37.9%)                    |             |
| 60 – 69                  | 244 (42.3%)               | 246 (41.1%)                    |             | 165 (44.2%)                   | 174 (44.1%)                    |             | 79 (38.7%)               | 72 (35.5%)                    |             |
| 70 – 75                  | 88 (15.3%)                | 89 (14.9%)                     |             | 59 (15.8%)                    | 74 (18.7%)                     |             | 29 (14.2%)               | 15 (7.4%)                     |             |
| Female, n (%)            | 269 (46.2%)               | 293 (48.7%)                    | 0.398       | 164 (44.0%)                   | 184 (46.1%)                    | 0.549       | 105 (50.0%)              | 109 (53.7%)                   | 0.483       |
| Marital status, n (%)    |                           |                                | 0.501       |                               |                                | 0.348       |                          |                               | 0.654       |
| Married/living together  | 471 (80.5%)               | 478 (79.4%)                    |             | 299 (79.5%)                   | 321 (80.5%)                    |             | 172 (82.3%)              | 157 (77.3%)                   |             |
| Not/never been married   | 30 (5.1%)                 | 34 (5.7%)                      |             | 18 (4.8%)                     | 18 (4.5%)                      |             | 12 (5.7%)                | 16 (7.9%)                     |             |
| Divorced                 | 48 (8.2%)                 | 61 (10.1%)                     |             | 33 (8.8%)                     | 43 (10.8%)                     |             | 15 (7.2%)                | 18 (8.9%)                     |             |
| Widowed                  | 36 (6.2%)                 | 29 (4.8%)                      |             | 26 (6.9%)                     | 17 (4.3%)                      |             | 10 (4.8%)                | 12 (5.9%)                     |             |

|                                                      |             |             |             |             |             |             |       |
|------------------------------------------------------|-------------|-------------|-------------|-------------|-------------|-------------|-------|
| Educational level <sup>†</sup> , <i>n</i> (%)        |             |             | 0.846       |             | 0.579       |             | 0.890 |
| <i>Low</i>                                           | 101 (17.3%) | 103 (17.1%) | 46 (12.2%)  | 53 (13.3%)  | 55 (26.3%)  | 50 (24.6%)  |       |
| <i>Middle</i>                                        | 222 (38.0%) | 238 (39.5%) | 134 (35.6%) | 153 (38.4%) | 88 (42.1%)  | 85 (41.9%)  |       |
| <i>High</i>                                          | 262 (44.8%) | 261 (43.4%) | 196 (52.1%) | 193 (48.4%) | 66 (31.6%)  | 68 (34.0%)  |       |
| Self-reported knowledge<br>of dementia, <i>n</i> (%) |             |             | 0.780       |             | 0.668       |             | 0.944 |
| <i>Good</i>                                          | 489 (84.5%) | 506 (85.0%) | 308 (83.2%) | 335 (84.4%) | 181 (86.6%) | 171 (86.4%) |       |
| <i>Insufficient</i>                                  | 90 (15.5%)  | 89 (15.0%)  | 62 (16.8%)  | 62 (15.6%)  | 28 (13.4%)  | 27 (13.6%)  |       |

Abbreviations: SD: standard deviation; *n*: amount of people; \* Maximum value does not count up due to missing values; <sup>†</sup> Self-reported highest finalized degree, divided into low (primary school or low vocational education), middle (intermediate secondary education or intermediate vocational or higher secondary education) and high (higher vocational education or university).

1  
2  
3 **Box 1. Main expressions during the campaign (March 2018 - January 2019)**  
4  
5

|                                                                                                                                                                                              |                                                                                                                                                                                                                                                                                                                                                                                                                                                                                                                 |
|----------------------------------------------------------------------------------------------------------------------------------------------------------------------------------------------|-----------------------------------------------------------------------------------------------------------------------------------------------------------------------------------------------------------------------------------------------------------------------------------------------------------------------------------------------------------------------------------------------------------------------------------------------------------------------------------------------------------------|
| <p>6 <b>Local engagement</b></p> <p>7 <b>and support</b></p> <p>8</p> <p>9</p> <p>10</p> <p>11</p> <p>12</p> <p>13</p> <p>14</p> <p>15</p> <p>16</p> <p>17</p> <p>18</p> <p>19</p> <p>20</p> | <ul style="list-style-type: none"> <li>• More than 140 stakeholders (municipalities, schools, health care centres, companies) committed to this campaign by distributing campaign material/messages and/or organizing public events</li> <li>• Distribution of 35,000 campaign leaflets and more than 1.000 campaign posters (on more than 400 locations within the Province)</li> <li>• Organization of more than one public event per week (n=52; lecture, workshop or other community activities)</li> </ul> |
| <p>21 <b>Campaign</b></p> <p>22 <b>website<sup>24</sup></b></p> <p>23</p> <p>24</p> <p>25</p> <p>26</p>                                                                                      | <ul style="list-style-type: none"> <li>• More than 10,000 website visits</li> <li>• Online campaign posters are downloaded more than 5.500 times in total</li> </ul>                                                                                                                                                                                                                                                                                                                                            |
| <p>27 <b>Media</b></p> <p>28</p> <p>29</p> <p>30</p> <p>31</p> <p>32</p> <p>33</p>                                                                                                           | <ul style="list-style-type: none"> <li>• Over 65 media outlets (e.g. newspaper item, radio-interview)</li> <li>• Campaign tweets reached 200,000 people</li> <li>• Facebook messages reached more than 15,000 people</li> </ul>                                                                                                                                                                                                                                                                                 |
| <p>34 <b>eHealth platform<sup>25</sup></b></p> <p>35</p> <p>36</p> <p>37</p> <p>38</p> <p>39</p> <p>40</p>                                                                                   | <ul style="list-style-type: none"> <li>• 9,000 downloads MijnBreincoach app</li> <li>• Ministry of Health, Welfare and Sport in The Netherlands incorporated the app on their website on innovations in health care</li> </ul>                                                                                                                                                                                                                                                                                  |

### *Difference in level of awareness before and after the campaign (total sample)*

Figure 1 displays a pre- and post-campaign comparison of the percentage of participants agreeing that dementia risk reduction is possible, and the percentage of participants identifying the three campaign themes. No difference in awareness was observed ( $\chi^2(1) = 1.27, p = 0.260$ ). Cognitive activity was identified most often as being protective against dementia at both pre- (79.4%) and post-assessment (80.4%), but there was no increase in awareness ( $\chi^2(1) = 0.17, p = 0.677$ ). A modest increase in awareness was observed for physical activity (7.6% increase;  $\chi^2(1) = 7.48, p \leq 0.01$ ) and healthy diet (10.5% increase;  $\chi^2(1) = 12.37, p \leq 0.001$ ). Higher educated participants were more aware of dementia risk reduction compared to lower educated participants, both in the pre-assessment (low 18.2%, middle 38.9%, high 59.4%;  $\chi^2(2) = 53.46, p \leq 0.001$ ) and post-assessment (low 29.3%, middle 33.9%, high 52.3%;  $\chi^2(2) = 24.15, p \leq 0.001$ ). The same applies to the identification of the three campaign themes.

----- **Insert Figure 1 here** -----

### *Differences between the two campaign approaches*

No significant difference in level of awareness was found for both the population (47.1% to 40.5%;  $\chi^2(1) = 3.39, p = 0.066$ ) and district sample (39.9% to 42.7%;  $\chi^2(1) = 0.33, p = 0.565$ ). Cognitive activity was not identified more often as a protective factor for dementia in both the population (79.9% to 81.8%;  $\chi^2(1) = 0.43, p = 0.510$ ) and district sample (78.5% to 77.7%;  $\chi^2(1) = 0.04, p = 0.844$ ). Physical activity was identified more often in the population (65.6% to 73.3%;  $\chi^2(1) = 5.14, p \leq 0.05$ ), but not in the district sample (59.2% to 66.3%;  $\chi^2(1) = 2.17, p = 0.141$ ). Healthy diet was identified more often in both the population (51.7% to 62.3%;  $\chi^2(1) = 8.23, p \leq 0.01$ ) and district sample (47.3% to 57.4%;  $\chi^2(1) = 3.99, p \leq 0.05$ ). An increase was found of the LIBRA factors low-to-moderate alcohol use (26.9% to 38.4%;  $\chi^2(1) = 6.07, p \leq 0.05$ ), obesity (19.9% to 28.4%;  $\chi^2(1) = 3.91, p \leq 0.05$ ) and smoking (29.3% to 42.9%;  $\chi^2(1) = 8.15, p \leq 0.01$ ) in the district sample. Higher educated participants were more aware of dementia risk reduction compared to lower educated participants, both in the pre-assessment (population



low 13.7%, middle 39.1%, high 60.2%;  $\chi^2(2) = 36.27, p \leq 0.001$ ; districts low 21.8%, middle 38.6%, high 56.9%;  $\chi^2(2) = 15.41, p \leq 0.001$ ) and the post-assessment (population low 31.4%, middle 30.0%, high 51.0%;  $\chi^2(2) = 17.49, p \leq 0.001$ ; districts low 27.1%, middle 41.0%, high 55.9%;  $\chi^2(2) = 9.72, p \leq 0.01$ ). In those with a low level of education in the population, an increase in awareness of dementia risk reduction was observed (17.7% increase;  $\chi^2(1) = 4.18, p \leq 0.05$ ), and for the campaign themes physical activity (22% increase;  $\chi^2(1) = 4.35, p \leq 0.05$ ) and healthy diet (25.3% increase;  $\chi^2(1) = 5.79, p \leq 0.05$ ).

#### *Exposure to the campaign and level of awareness in the total post-campaign sample (n=602)*

Of all post-campaign participants, 20% reported to have heard of the campaign, 19.7% of the slogan, and 21.8% about the eHealth platform. Awareness was higher for post-campaign participants who reported to have heard of the campaign (37.9% vs. 51.4%;  $\chi^2(1) = 6.52, p \leq 0.05$ ), the campaign slogan (37.2% vs. 53.3%;  $\chi^2(1) = 9.07, p \leq 0.01$ ) and the eHealth platform (36.6% vs. 54.8%;  $\chi^2(1) = 12.39, p \leq 0.001$ ). Campaign materials were more often recognized in the districts (35.2%) than in the population sample (26.8%;  $\chi^2(1) = 3.92, p \leq 0.05$ ). More than a third (37.2%) expressed to have become more aware of their brain health, and 30.4% stated to have engaged in a brain-healthy lifestyle. Physical activity (45.8%), eating healthy (40.9%), and weight management (39.4%) were most often engaged in during the past year.

#### *Self-reported knowledge of dementia*

Figure 2 displays the level of awareness by self-reported general knowledge of dementia in the post-assessment sample. Participants who stated that their general knowledge of dementia was considerable or good were more aware of dementia risk reduction than participants with self-reported insufficient general knowledge ( $\chi^2(1) = 6.48, p \leq 0.05$ ). The same applies for the identification of the risk/protective factors physical activity ( $\chi^2(1) = 4.59, p \leq 0.05$ ), healthy diet ( $\chi^2(1) = 7.32, p \leq 0.01$ ), smoking ( $\chi^2(1) = 8.18, p \leq 0.01$ ), depression ( $\chi^2(1) = 5.44, p \leq 0.05$ ), diabetes ( $\chi^2(1) = 8.31, p \leq 0.01$ ), and hypercholesterolemia ( $\chi^2(1) = 6.60, p \leq 0.01$ ).

-----Insert Figure 2 here -----

### *The eHealth platform*

The 12-item “quick test” was completed more than 13,300 times. The mean age of this group was 57 years (SD 14.3; range 18-94y), 68% were female and 76% were higher educated. Room for improvement (according to self-reported presence or absence of risk/protective factors) was highest for the LIBRA factors hypertension, hypercholesterolemia, and alcohol consumption. Almost 36% (n=4,755) created an account and completed the more comprehensive administration (mean age 57 years, 72% female, 78% higher educated). Room for improvement, based on the extensive LIBRA administration using validated questionnaires, was highest for physical inactivity, adherence to a Mediterranean diet, and cognitive activity. These were also the factors that were chosen most often for receiving daily notifications.

## **4. Discussion**

This paper presents the results of the first health promotion campaign in The Netherlands aimed at increasing awareness of dementia risk reduction in middle-aged community-dwelling individuals. In general, this study was not successful since no population-level change in awareness was observed. However, two out of the three campaign themes were identified more often after the campaign. People exposed to the campaign, its slogan and the eHealth platform were significantly more aware of dementia risk reduction and the three campaign themes. Participants from the district campaign recognized campaign material and the eHealth platform more often.

Unfortunately, awareness of dementia risk reduction and knowledge of most LIBRA factors did not increase. Several reasons might exist, one of them being that, due to a limited budget, the coverage of this campaign was insufficient to reach population-level increase in awareness. In addition, it could be that the statement to assess awareness was too complex (“there is nothing anyone can do to reduce their risks of getting dementia”). A simpler, positively formulated statement might have been more suitable for our purpose. The used statement was taken from the BSA 2015<sup>18</sup> in order to compare dementia literacy

1  
2  
3 between the United Kingdom and the Netherlands. Furthermore, there was no higher endorsement of the  
4 protective factor cognitive activity after the campaign. This might be explained by a ceiling effect, as  
5 many people already considered it to be a protective factor at baseline.  
6  
7  
8

9  
10 Awareness of dementia risk reduction was higher in highly educated participants. However, awareness  
11 only improved in the lower educated group (particularly in the population sample). This is notable, since  
12 literature suggests that health promotion campaigns tend to reach higher educated people.<sup>20-22</sup> Importantly,  
13 the campaign was designed with differences in health literacy and socio-economic status in mind (e.g.  
14 content checking by the MHS).  
15  
16  
17  
18  
19

20  
21 Literature on the effect of dementia risk reduction campaigns is scarce. An Australian study using an  
22 informative website on dementia risk reduction resulted in increased knowledge and motivation to engage  
23 in relevant health behaviours. However, no population-level measurements for evaluation were used and  
24 the study only included a post-intervention assessment of people visiting the website.<sup>27</sup>  
25  
26  
27  
28  
29

30  
31 Strengths of this study include the extensive pre- and post-campaign surveys, with large independent  
32 samples and comparable methodology.<sup>18</sup> Next, the consultation of experts in order to professionalize the  
33 campaign have been instrumental. In line with the WHO guidelines<sup>5</sup>, this campaign addressed multiple  
34 dementia risk factors and collaborated with stakeholders in a multidisciplinary approach.<sup>5</sup> The  
35 involvement of stakeholders created a “snowball effect”, as they communicated the campaign message  
36 via their own channels (see Box 1). Also, although the basic framework was set beforehand, the flexible  
37 design of the campaign made it possible to alter strategies along the way.  
38  
39  
40  
41  
42  
43  
44  
45

46 This study, however, also had limitations. First, this study was not inclusive regarding non-Dutch  
47 speaking individuals and individuals without Internet access. Furthermore, the population samples were  
48 drawn from participants from a previous survey interested in future research. This could have led to a pre-  
49 selection of people interested in scientific research and health. Last, the restrained resources of the team  
50 (e.g. to contact relevant stakeholders) limited the reach and effect of the campaign.  
51  
52  
53  
54  
55  
56  
57

1  
2  
3 These limitations were already acknowledged beforehand. This campaign was developed as a proof-of-  
4 concept study in a naturalistic setting, investigating campaign strategies and the extent of involvement of  
5 the community. At this stage, some lessons learned and recommendations for future campaigns should be  
6 discussed. In general, involvement of the community is an important determinant of success. Further, as  
7 this study shows that individuals with self-reported sufficient knowledge of dementia are more aware of  
8 dementia risk reduction, it is recommended to incorporate such a campaign into a general dementia  
9 campaign, or even a broad health promotion campaign, given the overlapping risk factors for  
10 cardiovascular disease and diabetes. In fact, incorporating lifestyle recommendations of various non-  
11 communicable diseases is one of the recommendations of the WHO.<sup>5</sup> Furthermore, it was striking that  
12 campaign activities were particularly visited by the older half (60-75 years) of the targeted population,  
13 despite our efforts in providing information online and using terms as “brain health” instead of “dementia  
14 risk”. Reaching younger individuals, with a positively framed message that dementia risk reduction is not  
15 a distant reality, is important to take into consideration. Next, it should be noted that increasing awareness  
16 is an essential yet insufficient step towards behavioural change. Altering complex and entrenched  
17 behaviours is very difficult, and unlikely to be sufficiently affected by this small-scale campaign. This  
18 was done to some extent by prompting people with low-level, positive messages on how to engage in  
19 brain-healthy activities. Yet, the main focus of this campaign was increasing awareness and not  
20 behavioural change.

## 21 22 23 24 25 26 27 28 29 30 31 32 33 34 35 36 37 38 39 40 41 42 **Conclusion**

43  
44 This study was not able to reach a population-level increase of awareness of dementia risk reduction, but  
45 did increase awareness and willingness to take action in those exposed. Future campaigns should scale up  
46 to maximize exposure and engagement in the population. More insight is needed on how increasing  
47 awareness may trigger lifestyle behaviour.  
48  
49  
50  
51  
52  
53  
54  
55  
56  
57  
58  
59  
60

**What is already known on this subject?**

Mounting evidence during the last decade has shown that modifiable risk factors play an important role in the development of dementia. Population-based data estimated that around a third of all dementia cases worldwide is attributable to seven modifiable risk factors. However, recent studies show that dementia risk reduction literacy is low and not much is known on how to increase awareness on population level.

**What this study adds?**

Maximizing exposure to this important public health message is of great importance, for example by incorporating it in a larger campaign on dementia or general health, and develop strategies that reach younger generations. Furthermore, engaging (local) stakeholders in the organization and execution of such a campaign is of great importance. Research on dementia risk reduction literacy should incorporate comparisons between demographic subgroups (age, sex, level of education) in order to tailor campaigns to meet the needs of subgroups.

1  
2  
3 **Acknowledgements:** We thank all participants, the municipal health services of North and South  
4 Limburg and the municipality of Roermond for their support in carrying out the survey. We thank  
5 Zuiderlicht, Betawerk B.V., Sananet B.V., the Department of Health Promotion of Maastricht University,  
6 the Dutch Alzheimer's Association, the Dutch Brain Foundation, Actiecentrum Limburg Positief Gezond  
7 and all other "campaign friends" for their consultation and contribution to this project.  
8  
9  
10  
11  
12

13  
14 **Funding:** This study was supported by the Province of Limburg (SAS-2015-04931) and the Health  
15 Foundation Limburg. The funders had no role in study design, in the collection, analysis and  
16 interpretation of data, in the writing of the report, and in the decision to submit the paper for publication.  
17  
18  
19  
20

21 **Competing interest:** none declared  
22  
23

24 **Contributorship statement:**  
25

26  
27 Irene Heger: study design, data collection, data analysis and interpretation, drafting the manuscript  
28

29  
30 Sebastian Köhler: study design, critical revision of the manuscript  
31

32  
33 Martin van Boxtel: study design, critical revision of the manuscript  
34

35  
36 Marjolein de Vugt: study design, critical revision of the manuscript  
37

38  
39 KlaasJan Hajema: data collection, critical revision of the manuscript  
40

41  
42 Frans Verhey: study design, critical revision of the manuscript  
43

44  
45 Kay Deckers: study design, data collection, data analysis and interpretation, study supervision  
46  
47  
48  
49  
50  
51  
52  
53  
54  
55  
56  
57  
58  
59  
60

1  
2  
3 **Figure Legends**  
4  
5

6 **Figure 1. Pre- and post-campaign comparison of the total sample.**  
7

8 Percentage agreeing with the statement that dementia risk reduction is possible, and percentage identifying the three  
9 target risk factors/themes of the campaign  
10  
11

12 **Figure 2. Level of awareness by self-reported general knowledge of dementia in the post-assessment sample**  
13

14 The percentages reflect the percentage of participants who agreed that a particular factor is a risk or protective factor  
15 for dementia.  
16  
17  
18  
19  
20  
21  
22  
23  
24  
25  
26  
27  
28  
29  
30  
31  
32  
33  
34  
35  
36  
37  
38  
39  
40  
41  
42  
43  
44  
45  
46  
47  
48  
49  
50  
51  
52  
53  
54  
55  
56  
57  
58  
59  
60

For peer review only

## References

1. Livingston G, Sommerlad A, Orgeta V, *et al.* Dementia prevention, intervention, and care. *Lancet* 2017;390:2673-734.
2. Patterson C. World Alzheimer Report 2018. London: Alzheimer's Disease International, 2018.
3. Lincoln P, Fenton K, Alessi C, *et al.* The Blackfriars Consensus on brain health and dementia. *Lancet* 2014;383:1805-06.
4. Norton S, Matthews FE, Barnes DE, *et al.* Potential for primary prevention of Alzheimer's disease: an analysis of population-based data. *Lancet Neurol* 2014;13:788-94.
5. Risk reduction of cognitive decline and dementia: WHO guidelines. Geneva: World Health Organization, 2019. Licence: CC BY-NC-SA 3.0 IGO.
6. Ngandu T, Lehtisalo J, Solomon A, *et al.* A 2 year multidomain intervention of diet, exercise, cognitive training, and vascular risk monitoring versus control to prevent cognitive decline in at-risk elderly people (FINGER): a randomised controlled trial. *Lancet* 2015;385:2255-63.
7. Moll van Charante EP, Richard E, Eurelings LS, *et al.* Effectiveness of a 6-year multidomain vascular care intervention to prevent dementia (preDIVA): a cluster-randomised controlled trial. *Lancet* 2016;388:797-805.
8. Andrieu S, Guyonnet S, Coley N, *et al.* Effect of long-term omega 3 polyunsaturated fatty acid supplementation with or without multidomain intervention on cognitive function in elderly adults with memory complaints (MAPT): a randomised, placebo-controlled trial. *Lancet Neurol* 2017;16:377-89.
9. Kivipelto M, Ngandu T, Laatikainen T, *et al.* Risk score for the prediction of dementia risk in 20 years among middle aged people: a longitudinal, population-based study. *Lancet Neurol* 2006;5:735-41.
10. Rosenberg A, Ngandu T, Rusanen M, *et al.* Multidomain lifestyle intervention benefits a large elderly population at risk for cognitive decline and dementia regardless of baseline characteristics: The FINGER trial. *Alzheimers Dement* 2018;14:263-70.
11. Kivipelto M, Mangialasche F, Ngandu T. Lifestyle interventions to prevent cognitive impairment, dementia and Alzheimer disease. *Nat Rev Neurol* 2018;14:653-66.
12. Deckers K, Kohler S, van Boxtel M, *et al.* Lack of associations between modifiable risk factors and dementia in the very old: findings from the Cambridge City over-75s cohort study. *Ageing Ment Health* 2017;22:1272-78.
13. Vos SJB, van Boxtel MPJ, Schiepers OJG, *et al.* Modifiable Risk Factors for Prevention of Dementia in Midlife, Late Life and the Oldest-Old: Validation of the LIBRA Index. *J Alzheimers Dis* 2017;58:537-47.
14. Prince M, Ali G-C, Guerchet M, *et al.* Recent global trends in the prevalence and incidence of dementia, and survival with dementia. *Alzheimers Res Ther* 2016;8:23-23.
15. Roehr S, Pabst A, Luck T, *et al.* Is dementia incidence declining in high-income countries? A systematic review and meta-analysis. *Clin Epidemiol* 2018;10:1233-47.
16. Satizabal CL, Beiser AS, Chouraki V, *et al.* Incidence of Dementia over Three Decades in the Framingham Heart Study. *The New England journal of medicine* 2016;374:523-32.
17. Heger I, Deckers K, van Boxtel M, *et al.* Dementia awareness and risk perception in middle-aged and older individuals: baseline results of the MijnBreincoach survey on the association between lifestyle and brain health. *BMC Public Health* 2019;19:678.
18. Marcinkiewicz A, Reid S. Attitudes to dementia: Findings from the 2016 British Social Attitudes survey London: NatCen Social Research, 2016.
19. Cations M, Radisic G, Crotty M, *et al.* What does the general public understand about prevention and treatment of dementia? A systematic review of population-based surveys. *PLoS One* 2018;13.
20. de Veer AJ, Peeters JM, Brabers AE, *et al.* Determinants of the intention to use e-Health by community dwelling older people. *BMC Health Serv Res* 2015;15:103.



- 1
  - 2
  - 3
  - 4
  - 5
  - 6
  - 7
  - 8
  - 9
  - 10
  - 11
  - 12
  - 13
  - 14
  - 15
  - 16
  - 17
  - 18
  - 19
  - 20
  - 21
  - 22
  - 23
  - 24
  - 25
  - 26
  - 27
  - 28
  - 29
  - 30
  - 31
  - 32
  - 33
  - 34
  - 35
  - 36
  - 37
  - 38
  - 39
  - 40
  - 41
  - 42
  - 43
  - 44
  - 45
  - 46
  - 47
  - 48
  - 49
  - 50
  - 51
  - 52
  - 53
  - 54
  - 55
  - 56
  - 57
  - 58
  - 59
  - 60
21. Eakin EG, Bull SS, Glasgow RE, *et al.* Reaching those most in need: a review of diabetes self-management interventions in disadvantaged populations. *Diabetes Metab Res Rev* 2002;18:26-35.
22. Luten KA, Dijkstra A, de Winter AF, *et al.* Developing a community-based intervention for Dutch older adults in a socioeconomically disadvantaged community. *Health Promot Int* 2018.
23. Centraal Bureau voor Statistiek (CBS) Statline; [Available at: <https://opendata.cbs.nl/statline/#/CBS/nl/dataset/03759ned/table?dl=26570>]. Accessed 12-09-2019.
24. Campaign website; [Available at: <https://www.wezijnzelfhetmedicijn.nl/>]. Accessed 27-01-2020.
25. MijnBreincoach webportal; [Available at: <https://www.mijnbreincoach.eu/>]. Accessed 24-01-2020.
26. Deckers K, van Boxtel MP, Schiepers OJ, *et al.* Target risk factors for dementia prevention: a systematic review and Delphi consensus study on the evidence from observational studies. *Int J Geriatr Psychiatry* 2015;30:234-46.
27. Farrow M. User perceptions of a dementia risk reduction website and its promotion of behavior change. *JMIR Res Protoc* 2013;2:e15-e15.

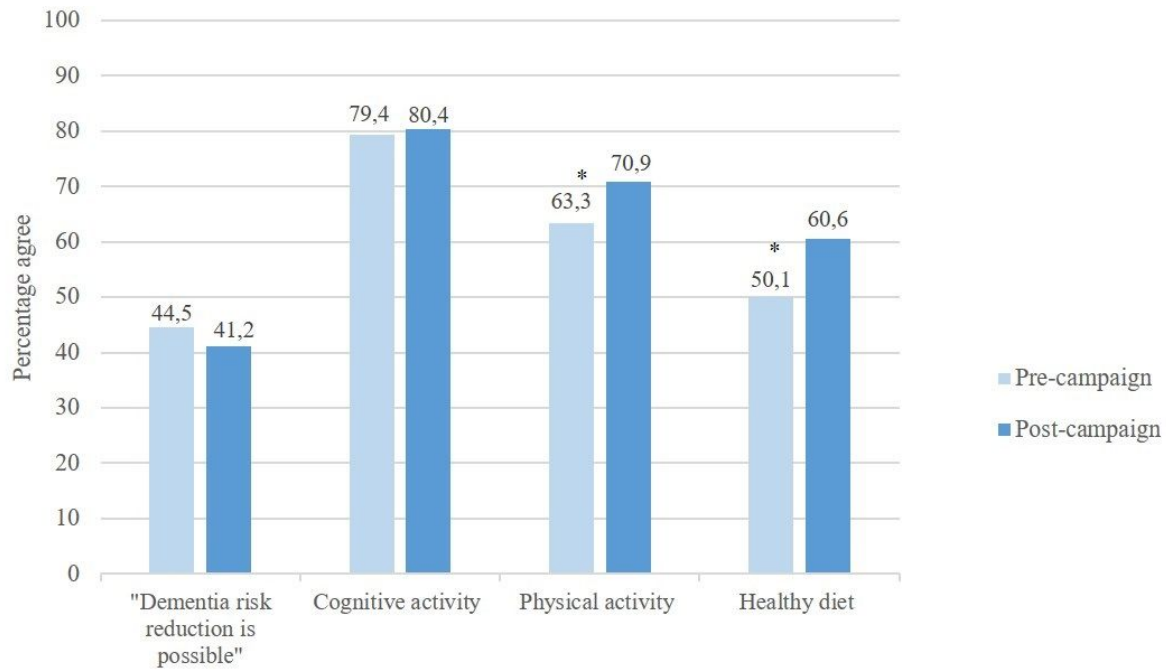

**Figure 1. Pre- and post-campaign comparison of the total sample.**

Percentage agreeing with the statement that dementia risk reduction is possible, and percentage identifying the three target risk factors/themes of the campaign

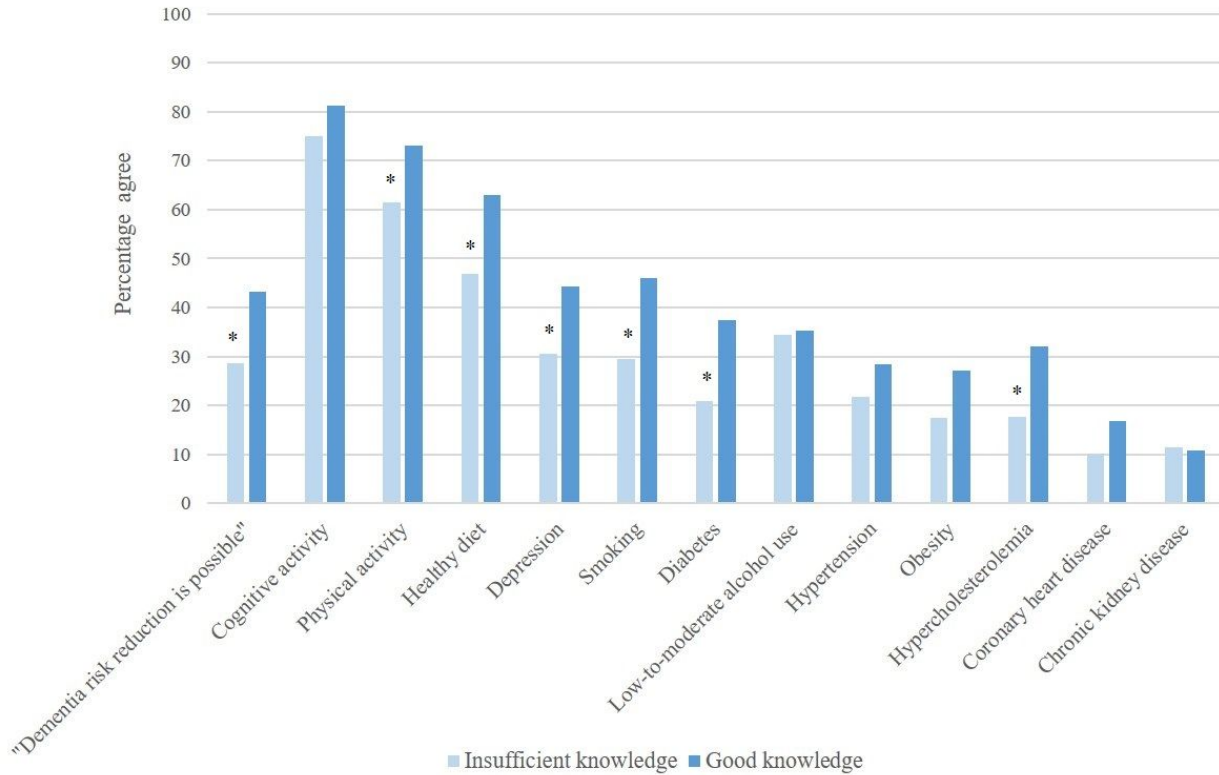

**Figure 2. Level of awareness by self-reported general knowledge of dementia in the post-assessment sample**

The percentages reflect the percentage of participants who agreed that a particular factor is a risk or protective factor for dementia.

## Supplementary Material 1. Examples of campaign materials<sup>24</sup>

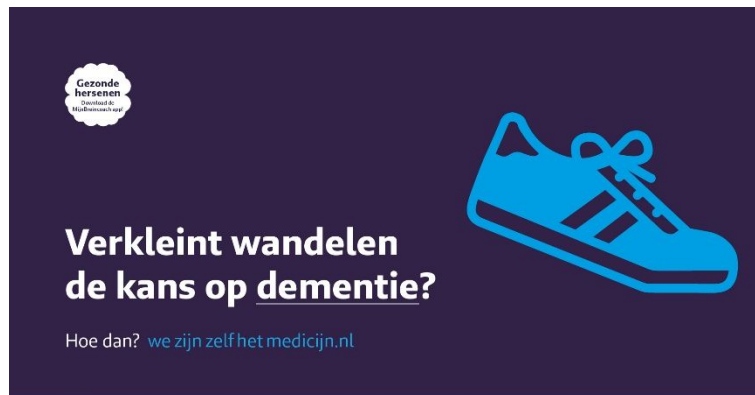

Dit is een campagne van Alzheimer Centrum Limburg i.s.m. vele partners.

*Campaign theme "Exercise regularly"*

*English translation: "Reduces walking the risk of dementia?"*

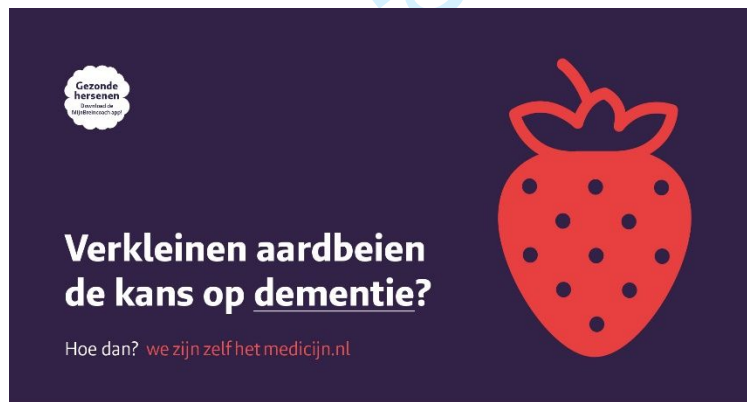

Dit is een campagne van Alzheimer Centrum Limburg i.s.m. vele partners.

*Campaign theme "Eat healthy"*

*English translation: "Reduces strawberries the risk of dementia?"*

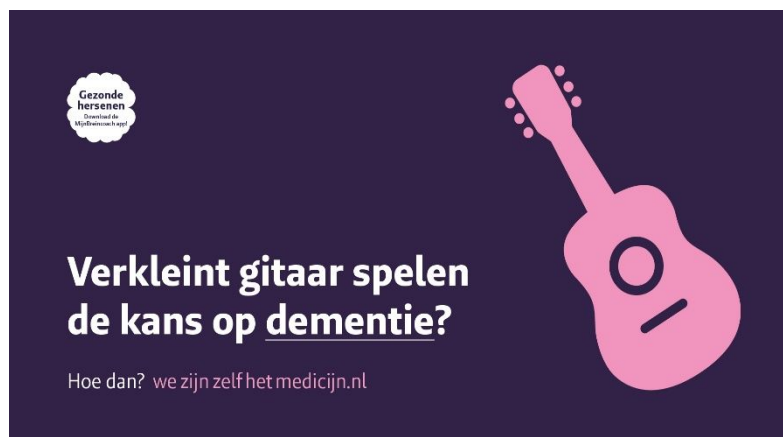

Dit is een campagne van Alzheimer Centrum Limburg i.s.m. vele partners.

*Campaign theme "Stay curious"*

*English translation: "Reduces playing guitar the risk of dementia?"*

## Supplementary Material 2: The MijnBreincoach eHealth platform<sup>25</sup>

The MijnBreincoach eHealth platform uses the LIBRA score [20, 21, 34-39] to give people insight into their own dementia risk profile and flags individual room for lifestyle improvement. The LIBRA index consists of 12 modifiable risk and protective factors for dementia. Users start with a 12-item “quick test” that assesses the LIBRA factors and flags personal room for improvement based on self-reported data on the presence and/or absence of the specific LIBRA factor. Next, a user can create an account and complete the more comprehensive administration that assesses the 12 LIBRA factors with follow-up questions on the “quick test” by validated questionnaires. People can get insight and feedback on their personal risk profile, identify areas of healthy behaviour (to facilitate maintenance), areas of unhealthy behaviour (to facilitate change), and identify chronic vascular/metabolic conditions (to facilitate appropriate management). A user can choose a lifestyle topic or health condition of interest (smoking, alcohol use, cognitive activity, healthy diet, physical activity, obesity, hypertension, diabetes, coronary heart disease, chronic kidney disease, depression, or hypercholesterolemia) and receives daily notifications (“nut of the day”) on how to improve brain health by means of that factor.

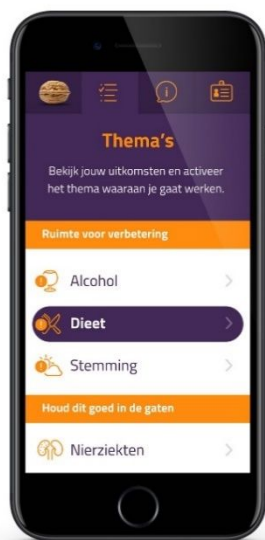

Personal profile with room for improvement

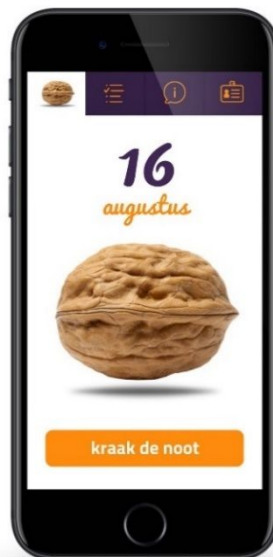

“Nut of the day”

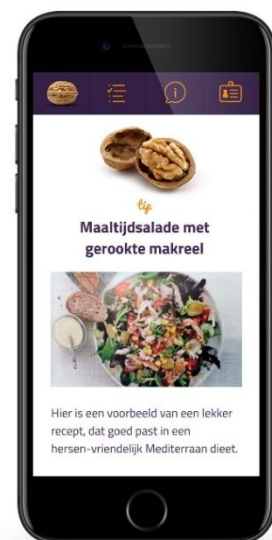

Short text message containing a recipe

## Supplementary Material 3. Flowchart of the population pre- and post-assessment

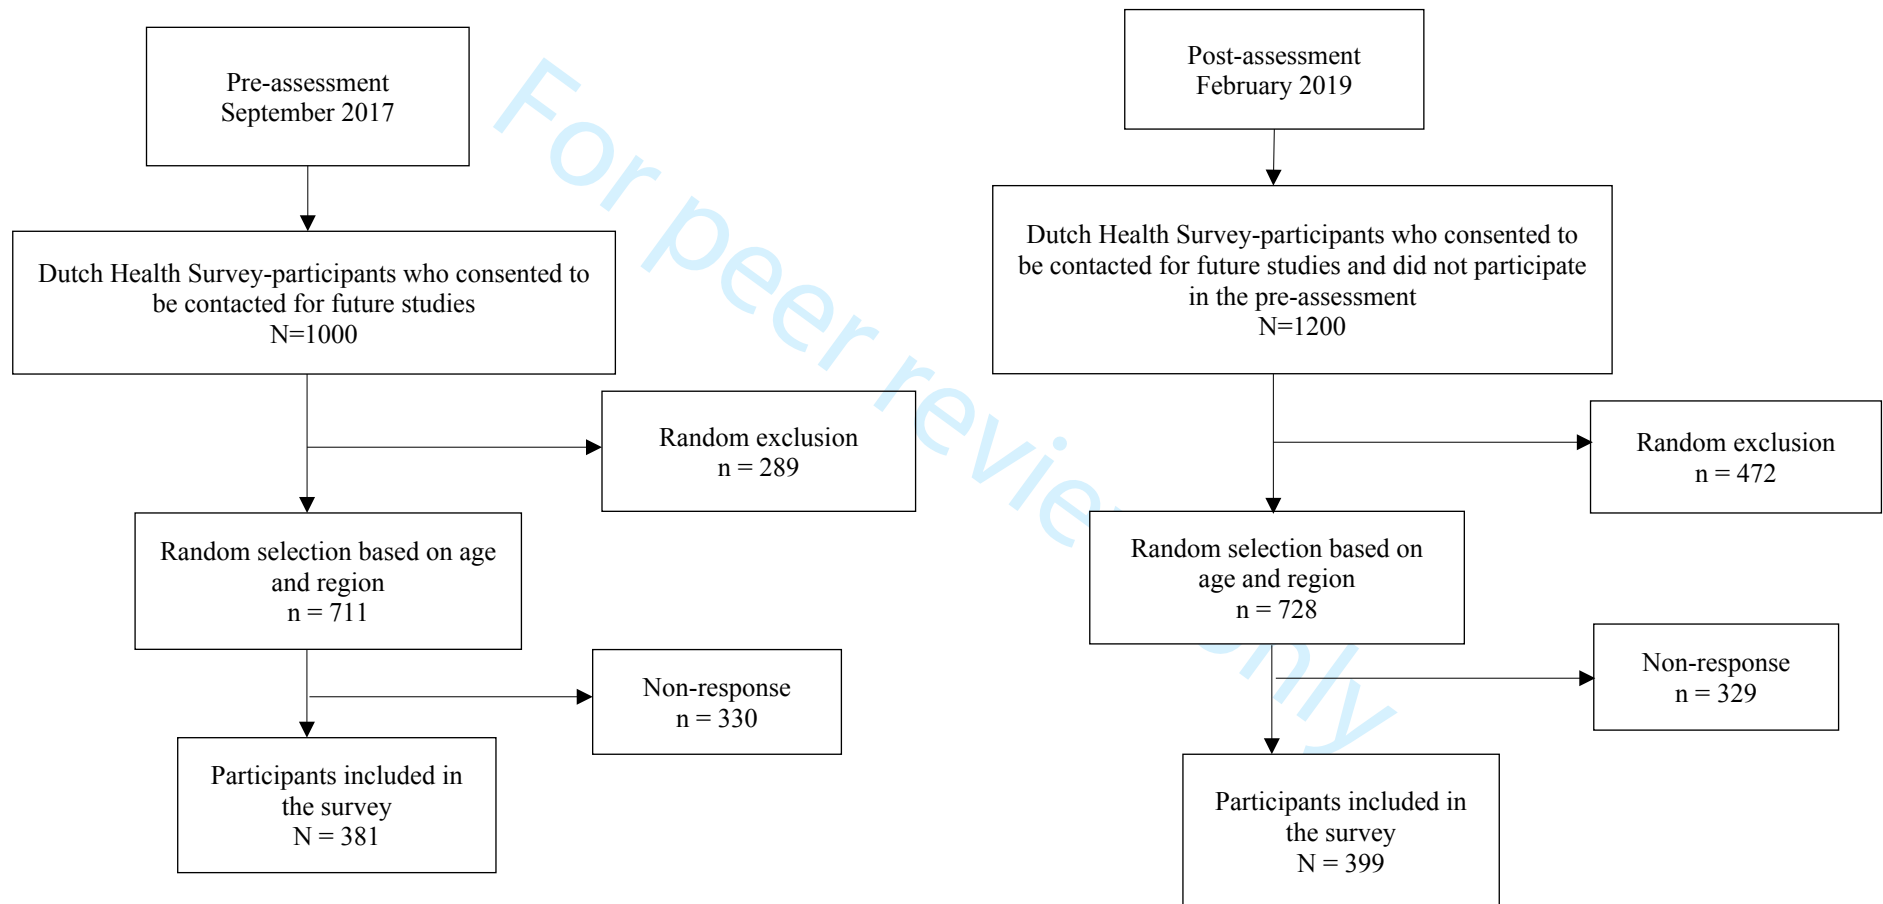

Supplementary Material 4a. Flowchart of the district pre-assessment

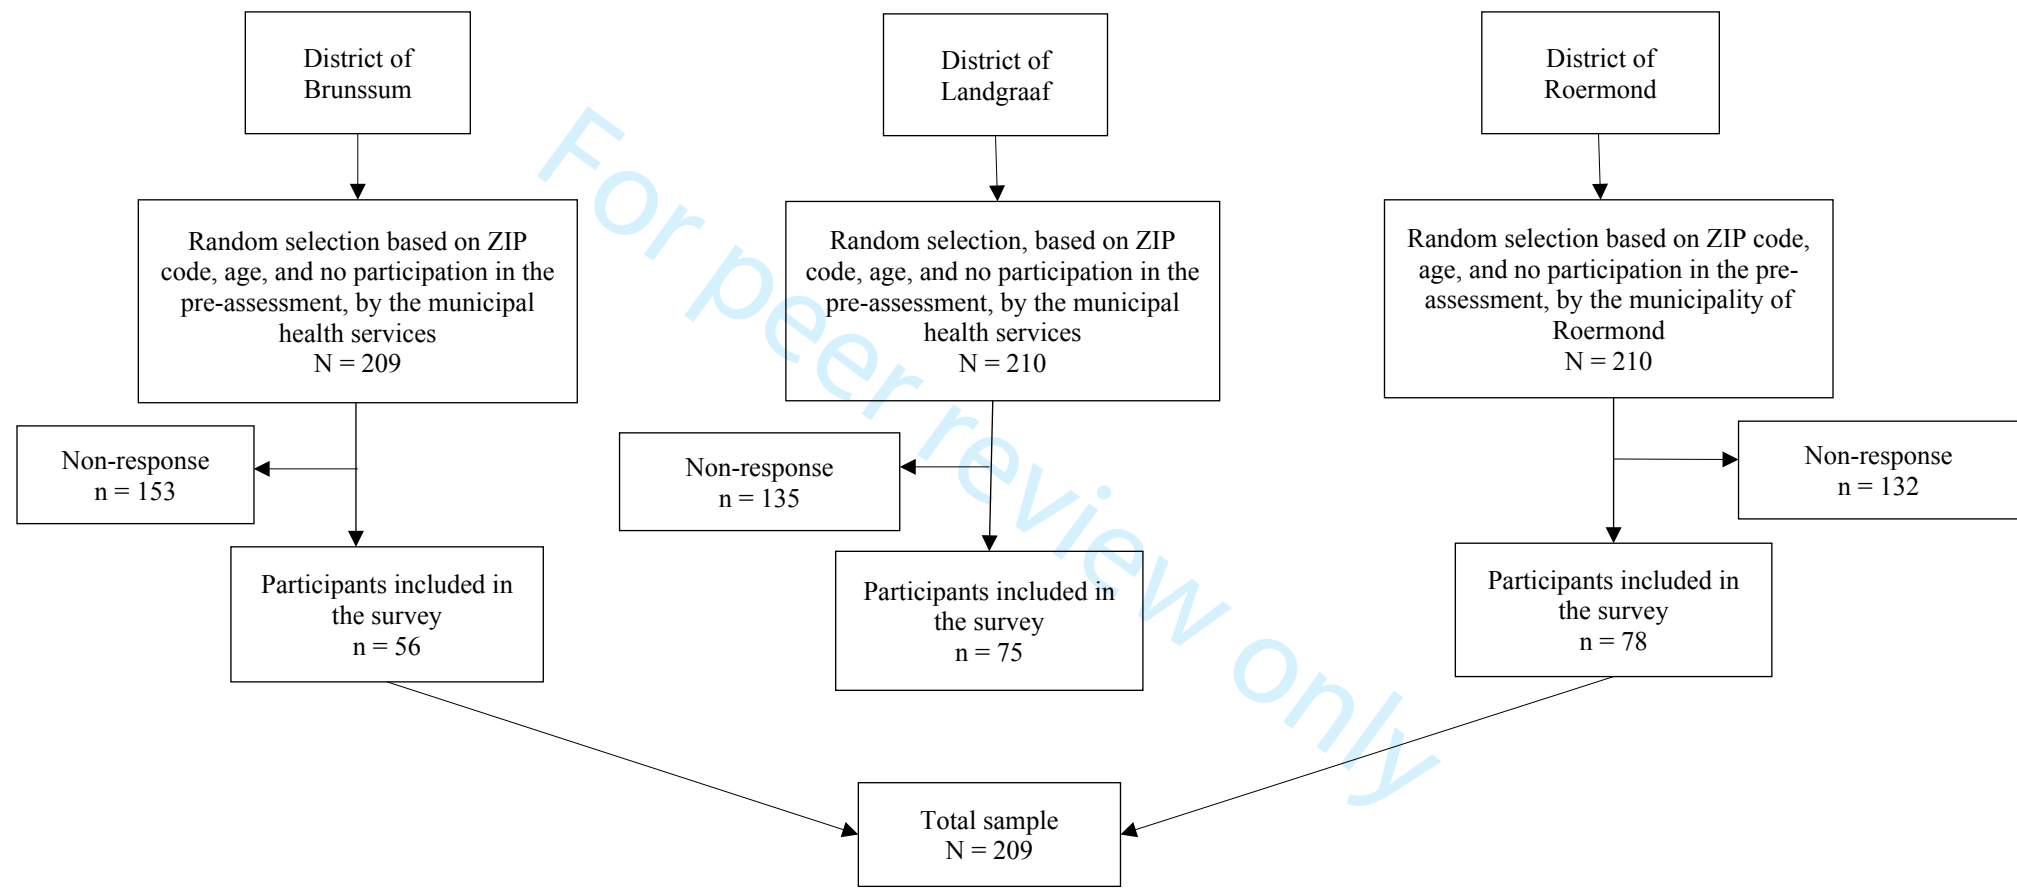

Supplementary Material 4b. Flowchart of the district post-assessment

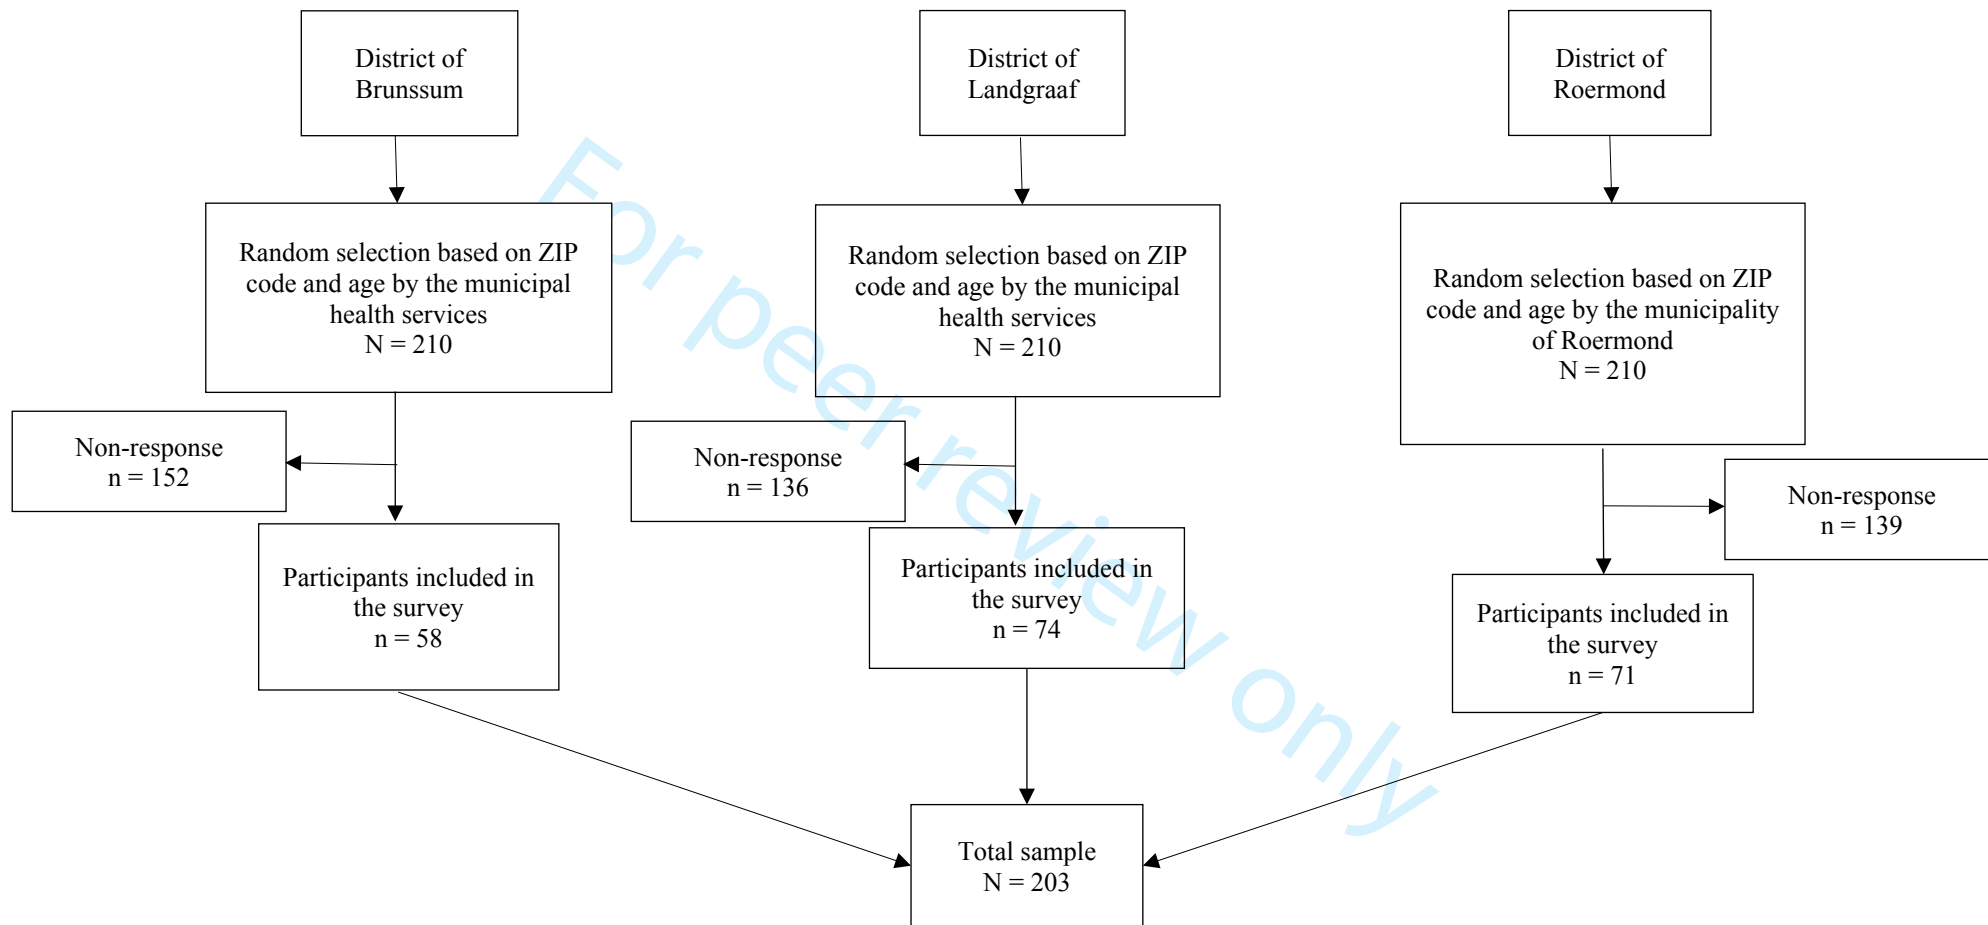



## Supplementary Material 5. Characteristics of the three districts before and after the campaign

| Variables*                       | District of Roermond (n = 149) |                      |         | District of Landgraaf (n = 149) |                      |         | District of Brunssum (n = 114) |                      |         |
|----------------------------------|--------------------------------|----------------------|---------|---------------------------------|----------------------|---------|--------------------------------|----------------------|---------|
|                                  | Pre-campaign (n=78)            | Post-campaign (n=71) | p-value | Pre-campaign (n=75)             | Post-campaign (n=74) | p-value | Pre-campaign (n=56)            | Post-campaign (n=58) | p-value |
| <b>Age, mean (SD)</b>            | 56.9 (8.7)                     | 55.4 (7.1)           | 0.247   | 60.9 (7.7)                      | 59.1 (8.6)           | 0.177   | 63.3 (8.1)                     | 57.7 (8.8)           | < 0.001 |
| <b>Age group (year), n (%)</b>   |                                |                      | 0.222   |                                 |                      | 0.241   |                                |                      | < 0.05  |
| <i>40 – 49</i>                   | 19 (24.4%)                     | 17 (23.9%)           |         | 4 (5.6%)                        | 12 (16.2%)           |         | 4 (7.3%)                       | 10 (17.2%)           |         |
| <i>50 – 59</i>                   | 30 (38.5%)                     | 29 (40.9%)           |         | 25 (35.2%)                      | 22 (29.7%)           |         | 14 (25.5%)                     | 26 (44.8%)           |         |
| <i>60 – 69</i>                   | 22 (28.2%)                     | 24 (33.8%)           |         | 33 (46.5%)                      | 31 (41.9%)           |         | 24 (43.6%)                     | 17 (29.3%)           |         |
| <i>70 – 75</i>                   | 7 (9.0%)                       | 1 (1.4%)             |         | 9 (12.7%)                       | 9 (12.2%)            |         | 13 (23.6%)                     | 5 (8.6%)             |         |
| <b>Female, n (%)</b>             | 39 (50.0%)                     | 41 (57.8%)           | 0.344   | 38 (50.7%)                      | 37 (50.0%)           | 0.935   | 28 (50.0%)                     | 31 (53.5%)           | 0.713   |
| <b>Marital status, n (%)</b>     |                                |                      | 0.144   |                                 |                      | 0.875   |                                |                      | 0.972   |
| <i>Married/living together</i>   | 66 (84.6%)                     | 49 (69.0%)           |         | 64 (85.3%)                      | 64 (86.5%)           |         | 42 (75.0%)                     | 44 (75.9%)           |         |
| <i>Not/never been married</i>    | 4 (5.1%)                       | 7 (9.9%)             |         | 4 (5.3%)                        | 4 (5.4%)             |         | 4 (7.1%)                       | 5 (8.6%)             |         |
| <i>Divorced</i>                  | 5 (6.4%)                       | 11 (15.5%)           |         | 5 (6.7%)                        | 3 (4.1%)             |         | 5 (8.9%)                       | 4 (6.9%)             |         |
| <i>Widowed</i>                   | 3 (3.9%)                       | 4 (5.6%)             |         | 2 (2.7%)                        | 3 (4.1%)             |         | 5 (8.9%)                       | 5 (8.6%)             |         |
| <b>Educational level†, n (%)</b> |                                |                      | 0.725   |                                 |                      | 0.996   |                                |                      | 0.985   |

|    |                                                   |            |            |            |            |            |            |
|----|---------------------------------------------------|------------|------------|------------|------------|------------|------------|
| 1  |                                                   |            |            |            |            |            |            |
| 2  |                                                   |            |            |            |            |            |            |
| 3  | <i>Low</i>                                        | 18 (23.1%) | 13 (18.3%) | 15 (20.0%) | 15 (20.3%) | 22 (39.3%) | 22 (37.9%) |
| 4  |                                                   |            |            |            |            |            |            |
| 5  | <i>Middle</i>                                     | 32 (41.0%) | 29 (40.9%) | 33 (44.0%) | 32 (43.2%) | 23 (41.1%) | 24 (41.4%) |
| 6  |                                                   |            |            |            |            |            |            |
| 7  | <i>High</i>                                       | 28 (35.9%) | 29 (40.9%) | 27 (36.0%) | 27 (36.5%) | 11 (19.6%) | 12 (20.7%) |
| 8  |                                                   |            |            |            |            |            |            |
| 9  |                                                   |            |            |            |            |            |            |
| 10 | <b>Self-reported knowledge of dementia, n (%)</b> |            | 0.186      |            | 0.475      |            | 0.634      |
| 11 |                                                   |            |            |            |            |            |            |
| 12 | <i>Good</i>                                       | 72 (92.3%) | 59 (85.5%) | 65 (86.7%) | 66 (90.4%) | 44 (78.6%) | 46 (82.1%) |
| 13 |                                                   |            |            |            |            |            |            |
| 14 | <i>Insufficient</i>                               | 6 (7.7%)   | 10 (14.5%) | 10 (13.3%) | 7 (9.6%)   | 12 (21.4%) | 10 (17.9%) |
| 15 |                                                   |            |            |            |            |            |            |

Abbreviations: SD: standard deviation; n: amount of people; \* Maximum value does not count up due to missing values; † Self-reported highest finalized degree, divided into low (primary school or low vocational education), middle (intermediate secondary education or intermediate vocational or higher secondary education) and high (higher vocational education or university).

**STROBE 2007 (v4) Statement—Checklist of items that should be included in reports of *cross-sectional studies***

| Section/Topic                | Item # | Recommendation                                                                                                                                                                       | Reported on page # |
|------------------------------|--------|--------------------------------------------------------------------------------------------------------------------------------------------------------------------------------------|--------------------|
| <b>Title and abstract</b>    | 1      | (a) Indicate the study’s design with a commonly used term in the title or the abstract                                                                                               | 1 and 2            |
|                              |        | (b) Provide in the abstract an informative and balanced summary of what was done and what was found                                                                                  | 2                  |
| <b>Introduction</b>          |        |                                                                                                                                                                                      |                    |
| Background/rationale         | 2      | Explain the scientific background and rationale for the investigation being reported                                                                                                 | 4                  |
| Objectives                   | 3      | State specific objectives, including any prespecified hypotheses                                                                                                                     | 5                  |
| <b>Methods</b>               |        |                                                                                                                                                                                      |                    |
| Study design                 | 4      | Present key elements of study design early in the paper                                                                                                                              | 5-6                |
| Setting                      | 5      | Describe the setting, locations, and relevant dates, including periods of recruitment, exposure, follow-up, and data collection                                                      | 5-7                |
| Participants                 | 6      | (a) Give the eligibility criteria, and the sources and methods of selection of participants                                                                                          | 7                  |
| Variables                    | 7      | Clearly define all outcomes, exposures, predictors, potential confounders, and effect modifiers. Give diagnostic criteria, if applicable                                             | 7                  |
| Data sources/<br>measurement | 8*     | For each variable of interest, give sources of data and details of methods of assessment (measurement). Describe comparability of assessment methods if there is more than one group | 7                  |
| Bias                         | 9      | Describe any efforts to address potential sources of bias                                                                                                                            | 7                  |
| Study size                   | 10     | Explain how the study size was arrived at                                                                                                                                            |                    |
| Quantitative variables       | 11     | Explain how quantitative variables were handled in the analyses. If applicable, describe which groupings were chosen and why                                                         | 7                  |
| Statistical methods          | 12     | (a) Describe all statistical methods, including those used to control for confounding                                                                                                | 7                  |
|                              |        | (b) Describe any methods used to examine subgroups and interactions                                                                                                                  | 7                  |
|                              |        | (c) Explain how missing data were addressed                                                                                                                                          | n.a.               |
|                              |        | (d) If applicable, describe analytical methods taking account of sampling strategy                                                                                                   | n.a.               |
|                              |        | (e) Describe any sensitivity analyses                                                                                                                                                | n.a.               |
| <b>Results</b>               |        |                                                                                                                                                                                      |                    |

1  
2  
3  
4  
5  
6  
7  
8  
9  
10  
11  
12  
13  
14  
15  
16  
17  
18  
19  
20  
21  
22  
23  
24  
25  
26  
27  
28  
29  
30  
31  
32  
33  
34  
35  
36  
37  
38  
39  
40  
41  
42  
43  
44  
45  
46

|                          |     |                                                                                                                                                                                                              |                                |
|--------------------------|-----|--------------------------------------------------------------------------------------------------------------------------------------------------------------------------------------------------------------|--------------------------------|
| Participants             | 13* | (a) Report numbers of individuals at each stage of study—eg numbers potentially eligible, examined for eligibility, confirmed eligible, included in the study, completing follow-up, and analysed            | 8                              |
|                          |     | (b) Give reasons for non-participation at each stage                                                                                                                                                         | n.a.                           |
|                          |     | (c) Consider use of a flow diagram                                                                                                                                                                           | Supplemental File 3, 4a and 4b |
| Descriptive data         | 14* | (a) Give characteristics of study participants (eg demographic, clinical, social) and information on exposures and potential confounders                                                                     | 9-10                           |
|                          |     | (b) Indicate number of participants with missing data for each variable of interest                                                                                                                          | n.a.                           |
| Outcome data             | 15* | Report numbers of outcome events or summary measures                                                                                                                                                         | 12                             |
| Main results             | 16  | (a) Give unadjusted estimates and, if applicable, confounder-adjusted estimates and their precision (eg, 95% confidence interval). Make clear which confounders were adjusted for and why they were included | 12                             |
|                          |     | (b) Report category boundaries when continuous variables were categorized                                                                                                                                    | 9                              |
|                          |     | (c) If relevant, consider translating estimates of relative risk into absolute risk for a meaningful time period                                                                                             | n.a.                           |
| Other analyses           | 17  | Report other analyses done—eg analyses of subgroups and interactions, and sensitivity analyses                                                                                                               | 12-13                          |
| <b>Discussion</b>        |     |                                                                                                                                                                                                              |                                |
| Key results              | 18  | Summarise key results with reference to study objectives                                                                                                                                                     | 14                             |
| Limitations              | 19  | Discuss limitations of the study, taking into account sources of potential bias or imprecision. Discuss both direction and magnitude of any potential bias                                                   | 15                             |
| Interpretation           | 20  | Give a cautious overall interpretation of results considering objectives, limitations, multiplicity of analyses, results from similar studies, and other relevant evidence                                   | 15-16                          |
| Generalisability         | 21  | Discuss the generalisability (external validity) of the study results                                                                                                                                        | 15-16                          |
| <b>Other information</b> |     |                                                                                                                                                                                                              |                                |
| Funding                  | 22  | Give the source of funding and the role of the funders for the present study and, if applicable, for the original study on which the present article is based                                                | 18                             |

\*Give information separately for cases and controls in case-control studies and, if applicable, for exposed and unexposed groups in cohort and cross-sectional studies.

**Note:** An Explanation and Elaboration article discusses each checklist item and gives methodological background and published examples of transparent reporting. The STROBE checklist is best used in conjunction with this article (freely available on the Web sites of PLoS Medicine at <http://www.plosmedicine.org/>, Annals of Internal Medicine at <http://www.annals.org/>, and Epidemiology at <http://www.epidem.com/>). Information on the STROBE Initiative is available at [www.strobe-statement.org](http://www.strobe-statement.org).

# BMJ Open

## Raising awareness for dementia risk reduction through a public health campaign: a pre-post study

|                                 |                                                                                                                                                                                                                                                                                                                                                                                                                                                                                                                                                                    |
|---------------------------------|--------------------------------------------------------------------------------------------------------------------------------------------------------------------------------------------------------------------------------------------------------------------------------------------------------------------------------------------------------------------------------------------------------------------------------------------------------------------------------------------------------------------------------------------------------------------|
| Journal:                        | <i>BMJ Open</i>                                                                                                                                                                                                                                                                                                                                                                                                                                                                                                                                                    |
| Manuscript ID                   | bmjopen-2020-041211.R1                                                                                                                                                                                                                                                                                                                                                                                                                                                                                                                                             |
| Article Type:                   | Original research                                                                                                                                                                                                                                                                                                                                                                                                                                                                                                                                                  |
| Date Submitted by the Author:   | 27-Aug-2020                                                                                                                                                                                                                                                                                                                                                                                                                                                                                                                                                        |
| Complete List of Authors:       | Heger, Irene; Maastricht University, School for Mental Health and Neuroscience<br>Köhler , Sebastian ; Maastricht University, School for Mental Health and Neuroscience<br>van Boxtel, Martin; Maastricht University, School for Mental Health and Neuroscience<br>de Vugt, Marjolein; Maastricht University, School for Mental Health and Neuroscience<br>Hajema, KlaasJan; GGD Zuid-Limburg<br>Verhey, Frans; Maastricht University, School for Mental Health and Neuroscience<br>Deckers, Kay; Maastricht University, School for Mental Health and Neuroscience |
| <b>Primary Subject Heading</b>: | Public health                                                                                                                                                                                                                                                                                                                                                                                                                                                                                                                                                      |
| Secondary Subject Heading:      | Communication                                                                                                                                                                                                                                                                                                                                                                                                                                                                                                                                                      |
| Keywords:                       | Dementia < NEUROLOGY, PREVENTIVE MEDICINE, PUBLIC HEALTH                                                                                                                                                                                                                                                                                                                                                                                                                                                                                                           |
|                                 |                                                                                                                                                                                                                                                                                                                                                                                                                                                                                                                                                                    |

SCHOLARONE™  
Manuscripts



I, the Submitting Author has the right to grant and does grant on behalf of all authors of the Work (as defined in the below author licence), an exclusive licence and/or a non-exclusive licence for contributions from authors who are: i) UK Crown employees; ii) where BMJ has agreed a CC-BY licence shall apply, and/or iii) in accordance with the terms applicable for US Federal Government officers or employees acting as part of their official duties; on a worldwide, perpetual, irrevocable, royalty-free basis to BMJ Publishing Group Ltd ("BMJ") its licensees and where the relevant Journal is co-owned by BMJ to the co-owners of the Journal, to publish the Work in this journal and any other BMJ products and to exploit all rights, as set out in our [licence](#).

The Submitting Author accepts and understands that any supply made under these terms is made by BMJ to the Submitting Author unless you are acting as an employee on behalf of your employer or a postgraduate student of an affiliated institution which is paying any applicable article publishing charge ("APC") for Open Access articles. Where the Submitting Author wishes to make the Work available on an Open Access basis (and intends to pay the relevant APC), the terms of reuse of such Open Access shall be governed by a Creative Commons licence – details of these licences and which [Creative Commons](#) licence will apply to this Work are set out in our licence referred to above.

Other than as permitted in any relevant BMJ Author's Self Archiving Policies, I confirm this Work has not been accepted for publication elsewhere, is not being considered for publication elsewhere and does not duplicate material already published. I confirm all authors consent to publication of this Work and authorise the granting of this licence.

1  
2  
3 **1 Raising awareness for dementia risk reduction through a public health**  
4  
5  
6 **2 campaign: a pre-post study**  
7

8 3 Irene Heger<sup>a\*</sup>, MSc, Sebastian Köhler<sup>a</sup>, PhD, Martin van Boxtel<sup>a</sup>, PhD, Marjolein de Vugt<sup>a</sup>, PhD,  
9  
10 4 KlaasJan Hajema<sup>b</sup>, PhD, Frans Verhey<sup>a</sup>, PhD, Kay Deckers<sup>a</sup>, PhD

11  
12  
13  
14 5 <sup>a</sup> Alzheimer Centre Limburg, School for Mental Health and Neuroscience, Maastricht University, P.O.  
15  
16 6 Box 616, 6200 MD Maastricht, the Netherlands

17  
18 7 <sup>b</sup> GGD Zuid-Limburg, P.O. Box 33, 6400 AA Heerlen, the Netherlands  
19  
20  
21 8

22  
23  
24 9 Word count abstract / manuscript: 297 / 3,736

25  
26  
27 10 IH: [irene.heger@maastrichtuniversity.nl](mailto:irene.heger@maastrichtuniversity.nl)

28  
29  
30 11 SK: [s.koehler@maastrichtuniversity.nl](mailto:s.koehler@maastrichtuniversity.nl)

31  
32  
33 12 MvB: [martin.vanboxtel@maastrichtuniversity.nl](mailto:martin.vanboxtel@maastrichtuniversity.nl)

34  
35  
36 13 MdV: [m.devugt@maastrichtuniversity.nl](mailto:m.devugt@maastrichtuniversity.nl)

37  
38  
39 14 KH: [KlaasJan.Hajema@ggdzl.nl](mailto:KlaasJan.Hajema@ggdzl.nl)

40  
41  
42 15 FV: [f.verhey@maastrichtuniversity.nl](mailto:f.verhey@maastrichtuniversity.nl)

43  
44  
45 16 KD: [kay.deckers@maastrichtuniversity.nl](mailto:kay.deckers@maastrichtuniversity.nl)

46  
47 17 \* Corresponding author

48  
49  
50 18 E-mail address: [irene.heger@maastrichtuniversity.nl](mailto:irene.heger@maastrichtuniversity.nl)

51  
52  
53 19 Telephone number: +31 43 - 38841043

54  
55  
56 20 Postal address: Universiteitssingel 40, 6229 ER Maastricht, the Netherlands.  
57

1  
2  
3 **21 Abstract**  
4  
5

6 **22 Objectives:** Evaluate the effect of a health promotion campaign aimed at increasing awareness about  
7  
8 **23** dementia risk reduction in middle-aged community-dwelling individuals in the Netherlands.  
9

10  
11 **24 Design:** A 10-month public health campaign using mass-media and community participation, supported  
12  
13 **25** by eHealth. Population-level difference in awareness before and after the campaign, including variation  
14  
15 **26** between demographic groups, was assessed in two independent cross-sectional samples from the same  
16  
17 **27** target population.  
18

19  
20 **28 Setting:** The public health campaign was launched in the Province of Limburg, the Netherlands, targeting  
21  
22 **29** all inhabitants aged 40 to 75 years old. Three specific districts within the Province were chosen for an  
23  
24 **30** additional community-participation approach, in which local stakeholders were invited to support the  
25  
26 **31** campaign.  
27

28  
29 **32 Results:** No pre- (n=590) post- (n=602) difference was observed in people agreeing to the statement that  
30  
31 **33** dementia risk reduction is possible ( $X^2(1) = 1.27, p = 0.260$ ). For the individual lifestyle factors, physical  
32  
33 **34** activity (7.6% increase ( $X^2(1) = 7.48, p = .006$ )) and healthy diet (10.5% increase ( $X^2(1) = 12.37, p \leq$   
34  
35 **35** 0.001)) were identified more often as being protective against dementia post-campaign. Of all  
36  
37 **36** risk/protective factors assessed, cognitive activity was identified most often at both pre- (79.4%) and post-  
38  
39 **37** assessment (80.4%), but there was no increase in awareness ( $X^2(1) = 0.17, p = 0.677$ ). Self-reported  
40  
41 **38** exposure to the campaign was associated with greater awareness and motivation for behavioural change  
42  
43 **39** ( $X^2(1) = 6.52, p = .011$ ). Compared to mass media only, the addition of community-participation resulted  
44  
45 **40** in better recognition of campaign-material and the eHealth-platform.  
46  
47

48  
49 **41 Conclusions:** This study was not able to reach a population-level increase of awareness of dementia risk  
50  
51 **42** reduction. Two out of the three lifestyle factors that formed the foundation of the campaign were  
52  
53 **43** identified more often post-campaign. Those reported having been exposed to the campaign were more  
54  
55 **44** aware and more inclined towards behavioural change.  
56  
57



## 45 **Strengths and limitations of this study**

- 46 • This study used extensive pre- and post-campaign surveys, with large independent samples from  
47 the same target population and comparable methodology.
- 48 • The public health campaign was designed in consultation with health promotion experts (i.e.  
49 municipal health services, Department of Health Promotion of Maastricht University, the  
50 Netherlands) and had a flexible design that made it possible to include local stakeholders during  
51 the campaign and alter strategies along the way.
- 52 • A positive approach was chosen for this health promotion campaign, for example by using the  
53 words “brain health” and “room for improvement” to raise awareness of dementia risk reduction,  
54 instead of focusing on unhealthy behaviours that increase the risk of dementia.
- 55 • The samples were drawn from people from a previous survey study who indicated their interest in  
56 future research, which could have led to selection bias (e.g. an overestimation of dementia risk  
57 reduction literacy).
- 58 • The reach and effect of the campaign was limited due to restrained resources of the research team  
59 to reach out to relevant stakeholders and due to a limited budget to cover (mass) media costs (e.g.  
60 advertisement in newspapers, billboards).

## 67 1. Introduction

68 Dementia is characterized by progressive decline of cognitive abilities, leading to interference in daily  
69 living. Alzheimer's disease (AD) and vascular dementia are the most common underlying pathologies,  
70 and often co-exist.<sup>1</sup> Due to the aging population, the number of people living with dementia worldwide is  
71 expected to triple from 50 million in 2018 to 152 million in 2050.<sup>2</sup> This rapid global increase and the  
72 absence of a curative treatment exposes a major public health concern.

73 Primary prevention of dementia through lifestyle modification is gaining increasing attention in research  
74 and policy.<sup>1,3-5</sup> Population-based estimations show that around one-third of all dementia cases might be  
75 attributable to seven lifestyle and health-related factors, including physical inactivity, depression, and low  
76 mental stimulation.<sup>4</sup> Reducing exposure to these risk factors by 10 to 20% per decade would lower the  
77 prevalence of AD by as much as 8 to 15%.<sup>4</sup> These insights have led to a series of randomized controlled  
78 trials (RCTs), using lifestyle interventions to delay or prevent cognitive decline and dementia onset.<sup>6-9</sup>  
79 Neither the multidomain Prevention of Dementia by Intensive Vascular Care (preDIVA) trial, in 3,454  
80 patients with known vascular risk factors aged 70-79 years, nor the Multidomain Alzheimer Preventive  
81 Trial (MAPT) in 1,680 adults aged 70 years and older resulted in significant reduction of incident  
82 dementia<sup>7</sup> and change in memory function,<sup>8</sup> or only in subgroups. In contrast, the population-based  
83 Finnish Geriatric Intervention Study to Prevent Cognitive Impairment and Disability (FINGER), starting  
84 earlier in those aged 60-77 years, was the first large-scale RCT that showed beneficial effects on  
85 cognition.<sup>6,10</sup> It seems that dementia risk reduction interventions should target people in midlife to  
86 minimize lifetime accumulation of risk factor exposure and consequent brain pathology.<sup>1,11-13</sup>

87 Recently, a global initiative aimed at harmonizing intervention studies on risk factor modification was  
88 launched, called World Wide (WW) FINGERS.<sup>11</sup> Incorporated trials include the US Study to Protect  
89 Brain Health Through Lifestyle Intervention to Reduce Risk (US POINTER) and the Singapore  
90 intervention study to prevent cognitive impairment and disability (SINGER).<sup>11</sup> The ambition of WW-

1  
2  
3 91 FINGERS to find robust evidence for lifestyle interventions that delay or prevent dementia onset is  
4  
5 92 promising from a public health perspective. In addition, epidemiological studies have shown decreasing  
6  
7 93 incidence of dementia in high-income countries, observed in several cohorts,<sup>14-16</sup> probably because of  
8  
9 94 improved cardiovascular health, nutrition and education over the last decades.<sup>2</sup> The timeliness of  
10  
11 95 dementia prevention interventions was also emphasized by the publication of guidelines for risk reduction  
12  
13 96 of cognitive decline and dementia by the World Health Organization (WHO) in 2019<sup>5</sup> and the 2020-report  
14  
15 97 of the Lancet Commission on Dementia Prevention, Intervention and Care<sup>17</sup>.

16  
17  
18 98 It must, however, be noted that the general public is still largely unaware of the potential of dementia risk  
19  
20 99 reduction, let alone of specific actions to reduce dementia risk.<sup>18-21</sup> In our own survey among middle-aged  
21  
22 100 adults (n=590), 44% were aware of dementia risk reduction, and only 20-25% considered vascular  
23  
24 101 conditions to increase the risk.<sup>18</sup> Hence, despite the need for conclusive RCTs, little is known about how  
25  
26 102 knowledge can be translated to the general public to raise awareness, and how to engage hard-to-reach  
27  
28 103 subgroups (e.g. low health literacy or socioeconomic status) who are often underrepresented in clinical  
29  
30 104 trials, too.<sup>22-24</sup> Creating risk awareness at the population level is a crucial first step before behaviour-  
31  
32 105 change programs can be developed and implemented.

33  
34  
35  
36 106 Dementia awareness campaigns have focused on topics as improving recognition of dementia,<sup>25</sup> dementia  
37  
38 107 care,<sup>26</sup> decreasing public stigma,<sup>27,28</sup> and few on dementia risk reduction.<sup>29,30</sup> An Australian study using an  
39  
40 108 informative website on dementia risk reduction resulted in increased knowledge and motivation to engage  
41  
42 109 in relevant health behaviours. However, no population-level measurements for evaluation were used and  
43  
44 110 the study only included a post-intervention assessment of people visiting the website.<sup>29</sup> One population-  
45  
46 111 based national awareness campaign in Ireland found a significant increase in people agreeing that “there  
47  
48 112 are things you can do to reduce your risk”. However, awareness of dementia risk reduction was not  
49  
50 113 associated with recognition of the advertisements used during the campaign.<sup>30</sup>

1  
2  
3 114 The goal of this study was to evaluate the impact of a health promotion campaign aimed at increasing  
4  
5 115 awareness about dementia risk reduction in middle-aged Dutch community-dwelling individuals.  
6  
7 116 Specifically, we tested change in the level of awareness at the population-level before and after the  
8  
9 117 campaign, variation between demographic groups, the effect of different approaches (mass media versus  
10  
11 118 additional community-participation) and the use of eHealth supportive technology, in order to distil the  
12  
13 119 lessons learned for future campaigns and policies.  
14  
15

## 16 120 **2. Methods**

### 17 121 *Target population*

18  
19  
20 122 The target population were inhabitants of the Province of Limburg, the Netherlands, aged 40 to 75 years  
21  
22 123 old (558,535 people in total<sup>31</sup>). The Ethics Review Committee Psychology and Neuroscience (ERCPN) of  
23  
24 124 Maastricht University approved this study (reference number 177-07-03-2017). All participants received  
25  
26 125 an information letter and signed a digital informed consent form prior to participation.  
27  
28  
29  
30

### 31 126 *Awareness campaign*

32  
33  
34 127 The primary aim of this campaign (March 2018 – January 2019) was to increase awareness on dementia  
35  
36 128 risk reduction. The secondary aim was to motivate people for behavioural change by means of eHealth.  
37  
38 129 The campaign was developed by the Alzheimer Centre Limburg (ACL) at Maastricht University and  
39  
40 130 Maastricht University Medical Centre+, in consultation with the Dutch Municipal Health Services (MHS)  
41  
42 131 and the Department of Health Promotion of Maastricht University. An agency for strategy and design  
43  
44 132 developed the campaign materials and website.<sup>32</sup> To maximize acceptance in the relatively young target  
45  
46 133 population, a positive phrasing was chosen for the slogan (“We are our own medicine”), terminology (e.g.  
47  
48 134 “brain health” rather than “dementia”), and campaign material visualizing the three campaign themes:  
49  
50 135 “eat healthy”, “exercise regularly”, and “stay curious” (see Supplemental File 1 for examples). The  
51  
52 136 campaign materials were discussed with stakeholders (Dutch Alzheimer’s Association and an evaluation  
53  
54 137 panel of potential end-users). We deliberately designed the campaign in a way that would address  
55  
56  
57  
58  
59  
60

1  
2  
3 138 different people. We provided both a low-level and free app with short, simple text messages that  
4  
5 139 appeared automatically on a daily basis, and provided an extensive website for background information  
6  
7 140 and references to extra literature (e.g. website Dutch Alzheimer's Association). Two different campaign  
8  
9 141 approaches were chosen in order to compare the outcome. A broad campaign was launched, targeting the  
10  
11 142 public via mass media such as newspapers and social media (hereafter "population sample"). Three  
12  
13 143 specific districts within the Province (Landgraaf-Schaesberg, Brunssum-Oost, and Roermond-  
14  
15 144 Hoogvonderen) were chosen based on varying socio-economic status, from low to middle-high, and  
16  
17 145 absence of other public health projects (hereafter "district sample"). We worked together with key-figures  
18  
19 146 and facilities in that district, in order to meet the specific needs and wishes of that district.  
20  
21  
22

#### 23 147 *The eHealth platform*

24  
25  
26 148 An online platform called *MijnBreincoach* ("MyBraincoach") was developed together with two software  
27  
28 149 companies and made available as a mobile app and web portal to the general public during the  
29  
30 150 campaign.<sup>33</sup> Users complete a "12-item quick test" using the well-validated Lifestyle for BRAin Health  
31  
32 151 (LIBRA) score.<sup>34</sup> This predictive model consists of twelve modifiable risk and protective factors for  
33  
34 152 dementia (e.g. smoking, physical inactivity, depression), and gives people insight into their personal  
35  
36 153 dementia risk profile. Detailed information can be found in Supplemental File 2.  
37  
38

#### 39 154 *Pre- and post-campaign surveys*

40  
41  
42 155 Two cross-sectional surveys were performed: one pre-campaign (September 2017<sup>18</sup>) and one post-  
43  
44 156 campaign (February 2019). The pre- and post-campaign surveys took place in independent samples, in  
45  
46 157 order to ensure that the potential increase in awareness was not caused by learning effects. The  
47  
48 158 methodology and results of the pre-campaign survey have been described in more detail elsewhere.<sup>18</sup>  
49  
50

#### 51 159 *Recruitment process*

1  
2  
3 160 The population samples were drawn by the MHS from participants of a previous national health survey  
4  
5 161 ('*Gezondheidsmonitor 2016*') who had agreed to be contacted for future studies. A random selection of  
6  
7 162 people (40-75 years) was invited to participate via email. The district samples were drawn from the  
8  
9 163 municipal registry by the municipality or by the MHS, based on ZIP-codes and age and received a postal  
10  
11 164 letter.

### 14 165 *Measurements*

16 166 Age, sex, marital status, educational level, self-reported knowledge of dementia and awareness of  
17  
18 167 dementia risk reduction were assessed both at the pre- and post-assessment. Ten items from the British  
19  
20 168 Social Attitudes (BSA) survey<sup>19</sup> were used, translated into Dutch. To assess all twelve factors from the  
21  
22 169 LIBRA-index,<sup>34</sup> custom-made items were also included.<sup>18</sup> The post-campaign survey included additional  
23  
24 170 items concerning exposure to the campaign (e.g. asking participants whether they recognized campaign  
25  
26 171 material). The items on exposure to the campaign were placed after the items assessing awareness,  
27  
28 172 thereby not influencing one's perspective on the possibility of dementia risk reduction. See  
29  
30 173 Supplementary File 3 for the complete pre- and post-campaign survey. The primary outcome of  
31  
32 174 awareness of dementia risk reduction was assessed as the difference between pre- and post-assessment in  
33  
34 175 the proportion of people rejecting the statement 'There is nothing I can do to reduce my dementia risk'.  
35  
36 176 We presented this statement in the Results section in a positive form for reasons of clarity ("dementia risk  
37  
38 177 reduction is possible"). Secondary outcomes were changes in endorsement of the three campaign themes  
39  
40 178 physical activity, cognitive activity and healthy diet.

### 44 179 *Statistical analyses*

45  
46 180 Independent groups *t*-tests and  $X^2$  tests were used to analyse differences between the pre- and post-  
47  
48 181 campaign samples, and between population and district samples, and to investigate differences in the  
49  
50 182 relation between socio-demographic variables and level of awareness and knowledge of risk and  
51  
52  
53  
54  
55  
56  
57  
58  
59  
60

1  
2  
3 183 protective factors. Analyses were performed in Stata 13.1 (StataCorp, College Station, TX, USA), with  
4  
5 184 the level of significance set at  $p \leq 0.05$  in two-tailed tests.  
6  
7

### 8 185 *Patient and Public Involvement*

9

10  
11 186 There were no patients involved in this research. Members of the public were involved in the design and  
12  
13 187 rollout of the public health campaign.  
14  
15

## 16 188 **3. Results**

17

### 18 189 *Demographics*

19

20  
21  
22 190 The response rates of the pre- and post-campaign surveys were highly comparable (population pre-  
23  
24 191 campaign 53.6%, post-campaign 54.8%; district pre-campaign 33.2%, post-campaign 32.2%). See  
25  
26 192 Supplemental File 4, 5a and 5b for flowcharts of the recruitment process. Table 1 shows the  
27  
28 193 characteristics of the total and the two separate samples. The characteristics of the districts can be found  
29  
30 194 in Supplemental File 6. The total pre-assessment sample was highly comparable with the total post-  
31  
32 195 assessment sample. As expected by design, the population sample was more highly educated than the  
33  
34 196 district sample at the pre- ( $X^2(2) = 29.57, p \leq 0.001$ ) and post-assessment ( $X^2(2) = 17.41, p \leq 0.001$ ). An  
35  
36 197 overview of the forms of community engagement are displayed in Box 1.  
37  
38  
39  
40  
41  
42  
43  
44  
45  
46  
47  
48  
49  
50  
51  
52  
53  
54  
55  
56  
57  
58  
59  
60

198 **Table 1. Characteristics of the two cross-sectional samples before and after the campaign, stratified by sampling frame (population and district sample).**

| Variables*               | Total sample (n = 1,192)  |                                |             | Population sample (n =780)    |                                |             | District sample (n =412) |                               |             |
|--------------------------|---------------------------|--------------------------------|-------------|-------------------------------|--------------------------------|-------------|--------------------------|-------------------------------|-------------|
|                          | Pre-campaign<br>(n = 590) | Post-<br>campaign<br>(n = 602) | p-<br>value | Pre-<br>campaign<br>(n = 381) | Post-<br>campaign<br>(n = 399) | p-<br>value | Pre-campaign<br>(n= 209) | Post-<br>campaign<br>(n= 203) | p-<br>value |
| Age, mean (SD)           | 60.7 (8.8)                | 59.9 (8.8)                     | 0.113       | 61.1 (8.9)                    | 61.2 (8.8)                     | 0.869       | 60.1 (8.6)               | 57.4 (8.3)                    | 0.002       |
| Age group (years), n (%) |                           |                                | 0.755       |                               |                                | 0.649       |                          |                               | 0.060       |
| 40 – 49                  | 75 (13.0%)                | 91 (15.2%)                     |             | 48 (12.9%)                    | 52 (13.2%)                     |             | 27 (13.2%)               | 39 (19.2%)                    |             |
| 50 – 59                  | 170 (29.5%)               | 172 (28.8%)                    |             | 101 (27.1%)                   | 95 (24.1%)                     |             | 69 (33.8%)               | 77 (37.9%)                    |             |
| 60 – 69                  | 244 (42.3%)               | 246 (41.1%)                    |             | 165 (44.2%)                   | 174 (44.1%)                    |             | 79 (38.7%)               | 72 (35.5%)                    |             |
| 70 – 75                  | 88 (15.3%)                | 89 (14.9%)                     |             | 59 (15.8%)                    | 74 (18.7%)                     |             | 29 (14.2%)               | 15 (7.4%)                     |             |
| Female, n (%)            | 269 (46.2%)               | 293 (48.7%)                    | 0.398       | 164 (44.0%)                   | 184 (46.1%)                    | 0.549       | 105 (50.0%)              | 109 (53.7%)                   | 0.483       |
| Marital status, n (%)    |                           |                                | 0.501       |                               |                                | 0.348       |                          |                               | 0.654       |
| Married/living together  | 471 (80.5%)               | 478 (79.4%)                    |             | 299 (79.5%)                   | 321 (80.5%)                    |             | 172 (82.3%)              | 157 (77.3%)                   |             |
| Not/never been married   | 30 (5.1%)                 | 34 (5.7%)                      |             | 18 (4.8%)                     | 18 (4.5%)                      |             | 12 (5.7%)                | 16 (7.9%)                     |             |
| Divorced                 | 48 (8.2%)                 | 61 (10.1%)                     |             | 33 (8.8%)                     | 43 (10.8%)                     |             | 15 (7.2%)                | 18 (8.9%)                     |             |
| Widowed                  | 36 (6.2%)                 | 29 (4.8%)                      |             | 26 (6.9%)                     | 17 (4.3%)                      |             | 10 (4.8%)                | 12 (5.9%)                     |             |



|                                                      |             |             |             |             |             |             |       |
|------------------------------------------------------|-------------|-------------|-------------|-------------|-------------|-------------|-------|
| Educational level <sup>†</sup> , <i>n</i> (%)        |             |             | 0.846       |             | 0.579       |             | 0.890 |
| <i>Low</i>                                           | 101 (17.3%) | 103 (17.1%) | 46 (12.2%)  | 53 (13.3%)  | 55 (26.3%)  | 50 (24.6%)  |       |
| <i>Middle</i>                                        | 222 (38.0%) | 238 (39.5%) | 134 (35.6%) | 153 (38.4%) | 88 (42.1%)  | 85 (41.9%)  |       |
| <i>High</i>                                          | 262 (44.8%) | 261 (43.4%) | 196 (52.1%) | 193 (48.4%) | 66 (31.6%)  | 68 (34.0%)  |       |
| Self-reported knowledge<br>of dementia, <i>n</i> (%) |             |             | 0.780       |             | 0.668       |             | 0.944 |
| <i>Good</i>                                          | 489 (84.5%) | 506 (85.0%) | 308 (83.2%) | 335 (84.4%) | 181 (86.6%) | 171 (86.4%) |       |
| <i>Insufficient</i>                                  | 90 (15.5%)  | 89 (15.0%)  | 62 (16.8%)  | 62 (15.6%)  | 28 (13.4%)  | 27 (13.6%)  |       |

199 Abbreviations: SD: standard deviation; *n*: amount of people; \* Maximum value does not count up due to missing values; <sup>†</sup> Self-reported highest finalized degree,  
 200 divided into low (primary school or low vocational education), middle (intermediate secondary education or intermediate vocational or higher secondary  
 201 education) and high (higher vocational education or university).

202 **Box 1. Forms of community engagement during the campaign (March 2018 - January 2019)**

**Local engagement**

**and support**

- More than 140 stakeholders (municipalities, schools, health care centres, companies) committed to this campaign by distributing campaign material/messages and/or organizing public events
- Distribution of 35,000 campaign leaflets and more than 1,000 campaign posters (at more than 400 locations within the Province)
- Organization of more than one public event per week (n=52; lecture, workshop or other community activities)

**Campaign website**

- More than 10,000 website visits
- Online campaign posters are downloaded more than 5,500 times in total

**Media**

- Over 65 media outlets (e.g. newspaper items, radio-interviews)
- Campaign tweets reached 200,000 people
- Facebook messages reached more than 15,000 people

**eHealth platform**

- 9,000 downloads MijnBreincoach app
- Ministry of Health, Welfare and Sport in The Netherlands incorporated the app on their website on innovations in health care

203

204 *Exposure to the campaign*

205 Of all post-campaign participants (n=602), 20.0% reported to have heard of the campaign, 19.7% of the  
206 slogan, 21.8% about the eHealth platform, and 29.8% recognized one of the campaign materials (e.g.  
207 poster, flyer). Women heard more often about the eHealth platform (27.5% vs. 16.3%;  $X^2(1) = 9.75, p$   
208 =.002) and recognized campaign material more often (34% vs. 25.8%;  $X^2(1) = 4.23, p=.040$ ) compared to  
209 men. Lower educated participants recognized campaign material more often than more highly educated  
210 participants did (33.5% vs. 25.1%;  $X^2(1) = 4.28, p=.039$ ).

211 *Difference in level of awareness before and after the campaign (total sample)*

212 Figure 1 displays a pre- and post-campaign comparison of the percentage of participants agreeing that  
213 dementia risk reduction is possible, and the percentage of participants identifying the three campaign  
214 themes. No difference in the primary outcome of awareness of dementia risk reduction was observed ( $X^2$   
215 (1) = 1.27,  $p= 0.260$ ). Cognitive activity was identified most often as being protective against dementia at  
216 both pre- (79.4%) and post-assessment (80.4%), but there was no increase in awareness ( $X^2(1) = 0.17, p$   
217 = 0.677). A modest increase in awareness was observed for physical activity (7.6% increase;  $X^2(1) =$   
218 7.48,  $p = .006$ ) and healthy diet (10.5% increase;  $X^2(1) = 12.37, p \leq 0.001$ ). More highly educated  
219 participants were more aware of dementia risk reduction compared to lower educated participants, both in  
220 the pre-assessment (low 18.2%, middle 38.9%, high 59.4%;  $X^2(2) = 53.46, p \leq 0.001$ ) and post-  
221 assessment (low 29.3%, middle 33.9%, high 52.3%;  $X^2(2) = 24.15, p \leq 0.001$ ). The same applies to the  
222 identification of the three campaign themes. In men, level of awareness decreased slightly with 8% ( $X^2$   
223 (1) = 3.89,  $p=.049$ ), but they identified the campaign theme “eat healthy” more often over time ( $X^2(1) =$   
224 10.99,  $p=.001$ ). The level of awareness remained stable over time in women ( $X^2(1) = 0.09, p = .770$ ),  
225 participants under the age of 65 years ( $X^2(1) = 0.78, p = .377$ ) and participants aged 65 and above ( $X^2(1)$   
226 = 1.46,  $p = .227$ ), but over time, the theme “exercise regularly” was identified more often by participants  
227 under the age of 65 years (9.4% increase;  $X^2(1) = 7.13, p=.008$ ).

228 ----- **Insert Figure 1 here** -----

229 *Differences between the two campaign approaches*

230 No significant difference in level of awareness was found for both the population (47.1% to 40.5%;  $X^2(1)$   
231 = 3.39,  $p=0.066$ ) and district sample (39.9% to 42.7%;  $X^2(1) = 0.33, p=0.565$ ). Compared to pre-  
232 assessment, cognitive activity was not identified more often as a protective factor for dementia at post-  
233 assessment, either in the population (79.9% to 81.8%;  $X^2(1) = 0.43, p = 0.510$ ) or district sample (78.5%  
234 to 77.7%;  $X^2(1) = 0.04, p = 0.844$ ). Physical activity was identified more often in the population (65.6%  
235 to 73.3%;  $X^2(1) = 5.14, p = .023$ ), but not in the district sample (59.2% to 66.3%;  $X^2(1) = 2.17, p =$   
236 0.141). Healthy diet was identified more often in both the population (51.7% to 62.3%;  $X^2(1) = 8.23, p$   
237 =.004) and district sample (47.3% to 57.4%;  $X^2(1) = 3.99, p = .046$ ). An increase was found of the LIBRA  
238 factors low-to-moderate alcohol use (26.9% to 38.4%;  $X^2(1) = 6.07, p = .014$ ), obesity (19.9% to 28.4%;  
239  $X^2(1) = 3.91, p = .048$ ) and smoking (29.3% to 42.9%;  $X^2(1) = 8.15, p = .004$ ) in the district sample. More  
240 highly educated participants were more aware of dementia risk reduction compared to lower educated  
241 participants, both in the pre-assessment (population low 13.7%, middle 39.1%, high 60.2%;  $X^2(2) =$   
242 36.27,  $p \leq 0.001$ ; districts low 21.8%, middle 38.6%, high 56.9%;  $X^2(2) = 15.41, p \leq 0.001$ ) and the post-  
243 assessment (population low 31.4%, middle 30.0%, high 51.0%;  $X^2(2) = 17.49, p \leq 0.001$ ; districts low  
244 27.1%, middle 41.0%, high 55.9%;  $X^2(2) = 9.72, p = .008$ ). In those with a low level of education in the  
245 population, an increase in awareness of dementia risk reduction was observed (17.7% increase;  $X^2(1) =$   
246 4.18,  $p = .041$ ), and for the campaign themes physical activity (22% increase;  $X^2(1) = 4.35, p = .037$ ) and  
247 healthy diet (25.3% increase;  $X^2(1) = 5.79, p = .016$ ).

248 *Exposure to the campaign and level of awareness in the total post-campaign sample (n=602)*

249 Awareness of dementia risk reduction was higher for post-campaign participants who reported to have  
250 heard compared to those who have not heard of the campaign (51.4% vs. 37.9%;  $X^2(1) = 6.52, p = .011$ ),  
251 the campaign slogan (53.3% vs. 37.2%;  $X^2(1) = 9.07, p = .003$ ) and the eHealth platform (54.8% vs.

252 36.6%;  $X^2(1) = 12.39, p \leq 0.001$ ). Campaign materials were more often recognized in the districts  
253 (35.2%) than in the population sample (26.8%;  $X^2(1) = 3.92, p = .048$ ). More than a third (37.2%)  
254 expressed to have become more conscious of lifestyle being related to their brain health, and 30.4% stated  
255 to have engaged in a brain-healthy lifestyle. Physical activity (45.8%), eating healthy (40.9%), and weight  
256 management (39.4%) were most often engaged in during the past year.

### 257 *Self-reported knowledge of dementia*

258 Figure 2 displays the level of awareness by self-reported general knowledge of dementia in the post-  
259 assessment sample. Participants who stated that their general knowledge of dementia was considerable or  
260 good were more aware of dementia risk reduction than participants with self-reported insufficient general  
261 knowledge ( $X^2(1) = 6.48, p = .011$ ). The same applied to the identification of the risk/protective factors  
262 physical activity ( $X^2(1) = 4.59, p = .032$ ), healthy diet ( $X^2(1) = 7.32, p = .007$ ), smoking ( $X^2(1) = 8.18, p$   
263  $= .004$ ), depression ( $X^2(1) = 5.44, p = .020$ ), diabetes ( $X^2(1) = 8.31, p = .004$ ), and hypercholesterolemia  
264 ( $X^2(1) = 6.60, p = .010$ ).

265 -----**Insert Figure 2 here**-----

### 266 *The eHealth platform*

267 Anonymous user-tracking showed that the 12-item “quick test” was completed more than 13,300 times by  
268 people from the general public during the campaign. The mean age of this group was 57 years (SD 14.3;  
269 range 18-94y), 68% were female and 76% were higher educated (i.e. higher vocational education or  
270 university). Room for improvement (according to self-reported presence or absence of risk/protective  
271 factors) was highest for the LIBRA factors hypertension, hypercholesterolemia, and alcohol consumption.  
272 Almost 36% (n=4,755) created an account and completed the more comprehensive administration (mean  
273 age 57 years, 72% female, 78% higher educated). Room for improvement, based on the extensive LIBRA  
274 administration using validated questionnaires, was highest for physical inactivity, adherence to a

1  
2  
3 275 Mediterranean diet, and cognitive activity. These were also the factors that were chosen most often for  
4  
5 276 receiving daily notifications.  
6  
7

#### 8 277 **4. Discussion**

9

10  
11 278 This paper presents the results of the first health promotion campaign in the Netherlands aimed at  
12  
13 279 increasing awareness of dementia risk reduction in middle-aged, community-dwelling individuals. In  
14  
15 280 general, this study was not successful since no population-level change in awareness was observed.  
16  
17 281 However, two out of the three campaign themes were identified more often after the campaign. People  
18  
19 282 exposed to the campaign, its slogan and the eHealth platform were significantly more aware of dementia  
20  
21 283 risk reduction and the three campaign themes. Participants from the district campaign recognized  
22  
23 284 campaign material and the eHealth platform more often.  
24  
25

26  
27 285 Unfortunately, awareness of dementia risk reduction and knowledge of most LIBRA factors did not  
28  
29 286 increase. Several reasons might exist. This campaign did not use national mass media, in contrast to a  
30  
31 287 population-based awareness campaign in Ireland that did find a significant increase in awareness of  
32  
33 288 dementia risk reduction.<sup>30</sup> Due to a limited budget and resources, the coverage of our campaign might  
34  
35 289 have been insufficient to reach population-level increase in awareness. Interestingly, our study did find an  
36  
37 290 increase in awareness in those who reported to have been exposed to the campaign, while the Irish study  
38  
39 291 could not differentiate between the exposed and non-exposed group.<sup>30</sup> Women stated more often than men  
40  
41 292 to be exposed to our campaign material and to have visited the eHealth platform, which is in line with  
42  
43 293 previous studies stating that women participate more than men in health campaigns.<sup>35</sup> However, this did  
44  
45 294 not translate in an increase in awareness in women at post-assessment. In addition, it could be that the  
46  
47 295 statement to assess awareness was too complex (“there is nothing I can do to reduce my dementia risk”).  
48  
49 296 A simpler, positively formulated statement might have been more suitable for our purpose. The statement  
50  
51 297 used was taken from the BSA 2015<sup>19</sup> in order to compare dementia literacy between the United Kingdom  
52  
53 298 and the Netherlands. Furthermore, there was no higher endorsement of the protective factor of cognitive  
54  
55  
56  
57  
58  
59  
60

1  
2  
3 299 activity after the campaign. This might be explained by a ceiling effect, as many people already  
4  
5 300 considered it to be a protective factor at baseline.  
6  
7

8 301 Strengths of this study include the extensive pre- and post-campaign surveys, in which we used multiple  
9  
10 302 items to assess awareness of dementia risk reduction in general, and specific risk and protective factors.  
11  
12 303 Furthermore, we used large independent samples and comparable methodology to a previous study  
13  
14 304 assessing awareness of dementia risk reduction.<sup>19</sup> Next, the intervention part (awareness campaign) of this  
15  
16 305 study was designed in consultation of experts, addressed, in line with the WHO guidelines,<sup>5</sup> multiple  
17  
18 306 dementia risk factors and collaborated with stakeholders in a multidisciplinary approach.<sup>5</sup> The  
19  
20 307 involvement of stakeholders created a “snowball effect”, as they communicated the campaign message  
21  
22 308 via their own channels (see Box 1). Also, although the basic framework was set beforehand, the flexible  
23  
24 309 design of the campaign made it possible to alter strategies along the way.  
25  
26  
27

28 310 This study, however, also had limitations. First, this study was not inclusive regarding non-Dutch  
29  
30 311 speaking individuals and individuals without internet access. Furthermore, the population samples were  
31  
32 312 drawn from participants from a previous survey interested in future research. This could have led to a pre-  
33  
34 313 selection of people interested in scientific research and health. Last, the restrained resources of the team  
35  
36 314 (e.g. to contact relevant stakeholders) limited the reach and effect of the campaign. These limitations were  
37  
38 315 already acknowledged beforehand. This campaign was developed as a proof-of-concept study in a  
39  
40 316 naturalistic setting, investigating campaign strategies and the extent of involvement of the community.  
41  
42

#### 43 317 *Recommendations for future campaigns*

44  
45

46 318 In general, involvement of the community is an important determinant of success. Further, as this study  
47  
48 319 shows that individuals with self-reported sufficient knowledge of dementia are more aware of dementia  
49  
50 320 risk reduction, it is recommended to incorporate such a campaign into a general dementia campaign, or  
51  
52 321 even a broad health promotion campaign, given the overlapping risk factors for cardiovascular disease  
53  
54 322 and diabetes. In fact, incorporating lifestyle recommendations of various non-communicable diseases is  
55  
56  
57

323 one of the recommendations of the WHO.<sup>5</sup> Furthermore, it is important to tailor health messages to  
324 specific subgroups (e.g. based on educational level, age, sex, high/low risk group). Their needs, wishes  
325 and barriers to engage in a brain-healthy lifestyle should be further explored, both prior to the execution  
326 of a campaign and as a post-campaign evaluation, for example by qualitative research. To illustrate,  
327 comparable to earlier studies,<sup>22-24</sup> our study showed that dementia risk reduction literacy was higher in  
328 more highly educated participants. However, campaign material was recognized more often and  
329 awareness only improved in the lower educated group (particularly in the population sample). The  
330 campaign was designed with differences in health literacy and socio-economic status in mind (e.g. content  
331 checking by the MHS). Also, it was striking that campaign activities (e.g. lectures, workshops) were  
332 particularly visited by the older half (60-75 years) of the targeted population, despite our efforts in  
333 providing information online and using terms as “brain health” instead of “dementia risk”. Reaching  
334 younger individuals, with a positively framed message on the potential of dementia risk reduction, is  
335 important to take into consideration. Next, it should be noted that increasing awareness is an essential yet  
336 insufficient step towards behavioural change. Altering complex and entrenched behaviours is very  
337 difficult, and unlikely to be sufficiently affected by this small-scale campaign. This was done to some  
338 extent by prompting people with low-level, positive messages on how to engage in brain-healthy  
339 activities. Yet, the main focus of this campaign was increasing awareness and not behavioural change.

## 340 **Conclusion**

341 This study was not able to reach a population-level increase of awareness of dementia risk reduction, but  
342 did increase awareness and willingness to take action in those exposed. Future campaigns should scale up  
343 to maximize exposure and engagement in the population. More insight is needed on how increasing  
344 awareness may trigger lifestyle behaviour.

345

346



1  
2  
3 347 **Acknowledgements:** We thank all participants, the municipal health services of North and South  
4  
5 348 Limburg and the municipality of Roermond for their support in carrying out the survey. We thank  
6  
7 349 Zuiderlicht, Betawerk B.V., Sananet B.V., the Department of Health Promotion of Maastricht University,  
8  
9 350 the Dutch Alzheimer's Association, the Dutch Brain Foundation, Actiecentrum Limburg Positief Gezond  
10  
11 351 and all other "campaign friends" for their consultation and contributions to this project.  
12  
13

14 352 **Funding:** This study was supported by the Province of Limburg (registration number: SAS-2015-04931)  
15  
16 353 and the Health Foundation Limburg (registration number: not applicable). The funders had no role in  
17  
18 354 study design, in the collection, analysis and interpretation of data, in the writing of the report, and in the  
19  
20 355 decision to submit the paper for publication.  
21  
22

23  
24 356 **Competing interest:** none declared  
25

26  
27 357 **Data sharing statement:** The dataset and statistical code are available upon reasonable request. No  
28  
29 358 additional data available.  
30

31  
32 359 **Contributorship statement:**  
33

34  
35 360 Irene Heger: study design, data collection, data analysis and interpretation, drafting the manuscript  
36

37  
38 361 Sebastian Köhler: study design, critical revision of the manuscript  
39

40  
41 362 Martin van Boxtel: study design, critical revision of the manuscript  
42

43  
44 363 Marjolein de Vugt: study design, critical revision of the manuscript  
45

46  
47 364 KlaasJan Hajema: data collection, critical revision of the manuscript  
48

49  
50 365 Frans Verhey: study design, critical revision of the manuscript  
51

52  
53 366 Kay Deckers: study design, data collection, data analysis and interpretation, study supervision  
54

55 367  
56  
57

1  
2  
3 **368 Figure Legends**  
4  
5

6 **369 Figure 1. Pre (n=590)- and post (n=602)-campaign comparison of the total sample.**  
7

8 370 Percentage agreeing with the statement that dementia risk reduction is possible, and percentage identifying the three  
9  
10 371 target risk factors/themes of the campaign. Maximum values and percentages do not count up due to missing values.

11 372 <sup>1</sup> Original statement presented to participants: “There is nothing I can do to reduce my dementia risk”. \* $p < .05$ ;

12  
13  
14 373 \*\* $p < .01$ ; \*\*\* $p < .001$   
15

16 **374 Figure 2. Level of awareness by self-reported general knowledge of dementia in the post-assessment sample**  
17  
18 **375 (n=602).**  
19

20 376 The percentages reflect the percentage of participants who agreed that a particular factor is a risk or protective factor  
21  
22 377 for dementia. Maximum values and percentages do not count up due to missing values. <sup>1</sup> Original statement

23  
24 378 presented to participants: “There is nothing I can do to reduce my dementia risk”. <sup>2</sup> Self-reported knowledge of

25  
26 379 dementia, divided into “Insufficient knowledge” (answering options “I don’t know”, “Nothing at all” and “Not very

27  
28 380 much”) and “Good knowledge” (“Some”, “Quite a lot” and “A great deal”). \* $p < .05$ ; \*\* $p < .01$ ; \*\*\* $p < .001$   
29  
30

31 381  
32  
33

34 382  
35  
36

37 383  
38  
39

40 384  
41  
42

43 385  
44  
45

46 386  
47  
48

49 387  
50  
51

52 388  
53  
54

55 389  
56  
57

390 **References**

- 391 1. Livingston G, Sommerlad A, Orgeta V, *et al.* Dementia prevention, intervention, and care. *Lancet* 392 2017;390:2673-734.
- 393 2. Patterson C. World Alzheimer Report 2018. London: Alzheimer's Disease International, 2018.
- 394 3. Lincoln P, Fenton K, Alessi C, *et al.* The Blackfriars Consensus on brain health and dementia. 395 *Lancet* 2014;383:1805-06.
- 396 4. Norton S, Matthews FE, Barnes DE, *et al.* Potential for primary prevention of Alzheimer's 397 disease: an analysis of population-based data. *Lancet Neurol* 2014;13:788-94.
- 398 5. Risk reduction of cognitive decline and dementia: WHO guidelines. Geneva: World Health 399 Organization, 2019.
- 400 6. Ngandu T, Lehtisalo J, Solomon A, *et al.* A 2 year multidomain intervention of diet, exercise, 401 cognitive training, and vascular risk monitoring versus control to prevent cognitive decline in at- 402 risk elderly people (FINGER): a randomised controlled trial. *Lancet* 2015;385:2255-63.
- 403 7. Moll van Charante EP, Richard E, Eurelings LS, *et al.* Effectiveness of a 6-year multidomain 404 vascular care intervention to prevent dementia (preDIVA): a cluster-randomised controlled trial. 405 *Lancet* 2016;388:797-805.
- 406 8. Andrieu S, Guyonnet S, Coley N, *et al.* Effect of long-term omega 3 polyunsaturated fatty acid 407 supplementation with or without multidomain intervention on cognitive function in elderly 408 adults with memory complaints (MAPT): a randomised, placebo-controlled trial. *Lancet Neurol* 409 2017;16:377-89.
- 410 9. Kivipelto M, Ngandu T, Laatikainen T, *et al.* Risk score for the prediction of dementia risk in 20 411 years among middle aged people: a longitudinal, population-based study. *Lancet Neurol* 412 2006;5:735-41.
- 413 10. Rosenberg A, Ngandu T, Rusanen M, *et al.* Multidomain lifestyle intervention benefits a large 414 elderly population at risk for cognitive decline and dementia regardless of baseline 415 characteristics: The FINGER trial. *Alzheimers Dement* 2018;14:263-70.
- 416 11. Kivipelto M, Mangialasche F, Ngandu T. Lifestyle interventions to prevent cognitive impairment, 417 dementia and Alzheimer disease. *Nat Rev Neurol* 2018;14:653-66.
- 418 12. Deckers K, Kohler S, van Boxtel M, *et al.* Lack of associations between modifiable risk factors and 419 dementia in the very old: findings from the Cambridge City over-75s cohort study. *Aging Ment 420 Health* 2017;22:1272-78.
- 421 13. Vos SJB, van Boxtel MPJ, Schiepers OJG, *et al.* Modifiable Risk Factors for Prevention of 422 Dementia in Midlife, Late Life and the Oldest-Old: Validation of the LIBRA Index. *J Alzheimers Dis 423 2017;58:537-47.*
- 424 14. Prince M, Ali G-C, Guerchet M, *et al.* Recent global trends in the prevalence and incidence of 425 dementia, and survival with dementia. *Alzheimers Res Ther* 2016;8:23-23.
- 426 15. Roehr S, Pabst A, Luck T, *et al.* Is dementia incidence declining in high-income countries? A 427 systematic review and meta-analysis. *Clin Epidemiol* 2018;10:1233-47.
- 428 16. Satizabal CL, Beiser AS, Chouraki V, *et al.* Incidence of Dementia over Three Decades in the 429 Framingham Heart Study. *N Engl J Med* 2016;374:523-32.
- 430 17. Livingston G, Huntley J, Sommerlad A, *et al.* Dementia prevention, intervention, and care: 2020 431 report of the Lancet Commission. *Lancet* 2020;396(10248):413-46.
- 432 18. Heger I, Deckers K, van Boxtel M, *et al.* Dementia awareness and risk perception in middle-aged 433 and older individuals: baseline results of the MijnBreincoach survey on the association between 434 lifestyle and brain health. *BMC Public Health* 2019;19:678.

- 1  
2  
3 435 19. Marcinkiewicz A, Reid S. Attitudes to dementia: Findings from the 2016 British Social Attitudes  
4 436 survey London: NatCen Social Research, 2016.
- 5 437 20. Cations M, Radisic G, Crotty M, *et al.* What does the general public understand about prevention  
6 438 and treatment of dementia? A systematic review of population-based surveys. *PLoS One*  
7 439 2018;13:e0196085.
- 8 440 21. Liu D, Cheng G, An L, *et al.* Public Knowledge about Dementia in China: A National WeChat-  
9 441 Based Survey. *Int J Environ Res Public Health* 2019;16:4231.
- 10 442 22. de Veer AJ, Peeters JM, Brabers AE, *et al.* Determinants of the intention to use e-Health by  
11 443 community dwelling older people. *BMC Health Serv Res* 2015;15:103.
- 12 444 23. Eakin EG, Bull SS, Glasgow RE, *et al.* Reaching those most in need: a review of diabetes self-  
13 445 management interventions in disadvantaged populations. *Diabetes Metab Res Rev* 2002;18:26-  
14 446 35.
- 15 447 24. Luten KA, Dijkstra A, de Winter AF, *et al.* Developing a community-based intervention for Dutch  
16 448 older adults in a socioeconomically disadvantaged community. *Health Promot Int* 2019;34:567-  
17 449 80.
- 18 450 25. Askari N, Bilbrey AC, Garcia Ruiz I, *et al.* Dementia Awareness Campaign in the Latino  
19 451 Community: A Novel Community Engagement Pilot Training Program with Promotoras. *Clin*  
20 452 *Gerontol* 2018;41:200-08.
- 21 453 26. Moorhouse P, Hamilton LM. Not if, but when: impact of a driving and dementia awareness and  
22 454 education campaign for primary care physicians. *CGJ* 2014;17:70-5.
- 23 455 27. Kim S, Werner P, Richardson A, *et al.* Dementia Stigma Reduction (DESeRvE): Study protocol for  
24 456 a randomized controlled trial of an online intervention program to reduce dementia-related  
25 457 public stigma. *Contemp Clin Trials Commun* 2019;14:100351.
- 26 458 28. Werner P, Kermel Schiffman I. Exposure to a national multimedia Alzheimer's disease awareness  
27 459 campaign: Assessing stigmatic beliefs towards persons with the disease. *Int J Geriatr Psychiatry*  
28 460 2018;33:e336-e42.
- 29 461 29. Farrow M. User perceptions of a dementia risk reduction website and its promotion of behavior  
30 462 change. *JMIR Res Protoc* 2013;2:e15.
- 31 463 30. Hickey D. The impact of a National Public Awareness Campaign on Dementia Knowledge and  
32 464 Help-seeking Intention in Ireland. Dublin: Health Service Executive: 2019.
- 33 465 31. Centraal Bureau voor Statistiek (CBS) Statline; [Available at:  
34 466 <https://opendata.cbs.nl/statline/#/CBS/nl/dataset/03759ned/table?dl=26570>. Accessed 12-09-  
35 467 2019.
- 36 468 32. Campaign website [Available at: <https://www.wezijnzelfhetmedicijn.nl/>. Accessed 19-12-2019.
- 37 469 33. Online platform MijnBreincoach [Available at: <https://www.mijnbreincoach.eu/>. Accessed 19-  
38 470 12-2019.
- 39 471 34. Deckers K, van Boxtel MP, Schiepers OJ, *et al.* Target risk factors for dementia prevention: a  
40 472 systematic review and Delphi consensus study on the evidence from observational studies. *Int J*  
41 473 *Geriatr Psychiatry* 2015;30:234-46.
- 42 474 35. Compennolle S, De Cocker K, Lakerveld J, *et al.* A RE-AIM evaluation of evidence-based multi-  
43 475 level interventions to improve obesity-related behaviours in adults: a systematic review (the  
44 476 SPOTLIGHT project). *Int J Behav Nutr Phys Act* 2014;11:147.

477

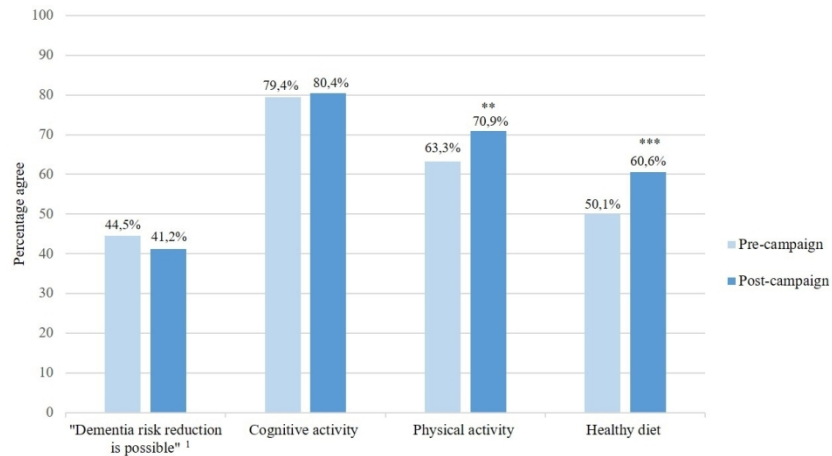

Figure 1. Pre (n=590)- and post (n=602)-campaign comparison of the total sample. Percentage agreeing with the statement that dementia risk reduction is possible, and percentage identifying the three target risk factors/themes of the campaign. Maximum values and percentages do not count up due to missing values. <sup>1</sup> Original statement presented to participants: "There is nothing I can do to reduce my dementia risk". \*p<.05; \*\*p<.01; \*\*\*p<.001

255x142mm (150 x 150 DPI)

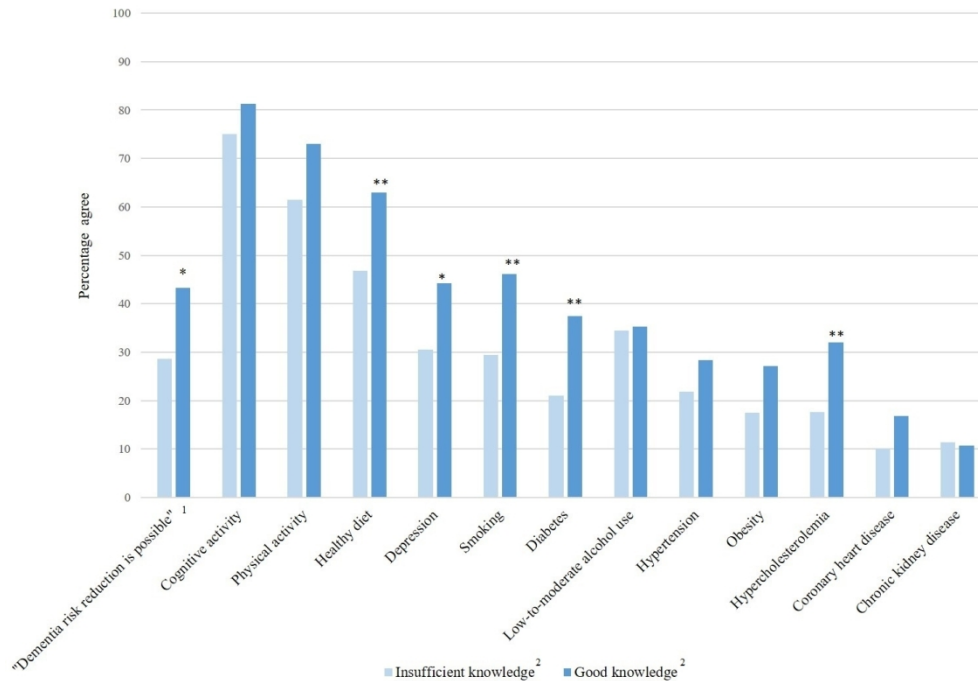

Figure 2. Level of awareness by self-reported general knowledge of dementia in the post-assessment sample (n=602).

The percentages reflect the percentage of participants who agreed that a particular factor is a risk or protective factor for dementia. Maximum values and percentages do not count up due to missing values. 1 Original statement presented to participants: "There is nothing I can do to reduce my dementia risk". 2 Self-reported knowledge of dementia, divided into "Insufficient knowledge" (answering options "I don't know", "Nothing at all" and "Not very much") and "Good knowledge" ("Some", "Quite a lot" and "A great deal").

\*p<.05; \*\*p<.01; \*\*\*p<.001

257x185mm (150 x 150 DPI)

## Supplementary File 1. Examples of campaign materials

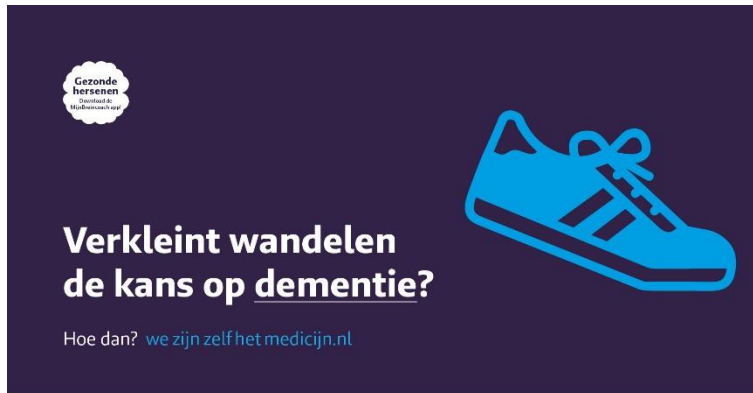

Dit is een campagne van Alzheimer Centrum Limburg i.s.m. vele partners.

*Campaign theme "Exercise regularly"*

*English translation: "Reduces walking the risk of dementia?"*

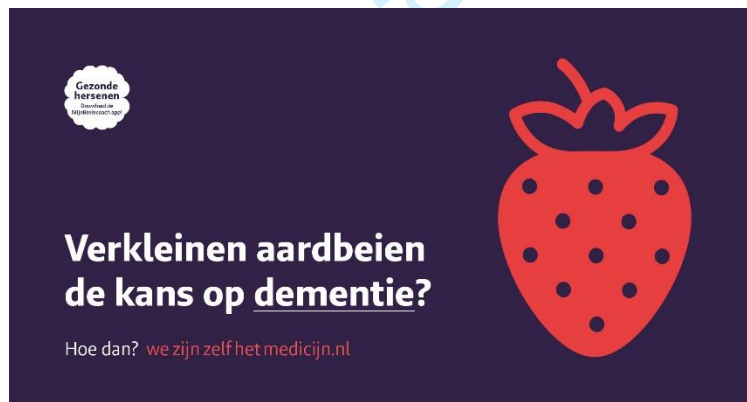

Dit is een campagne van Alzheimer Centrum Limburg i.s.m. vele partners.

*Campaign theme "Eat healthy"*

*English translation: "Reduces strawberries the risk of dementia?"*

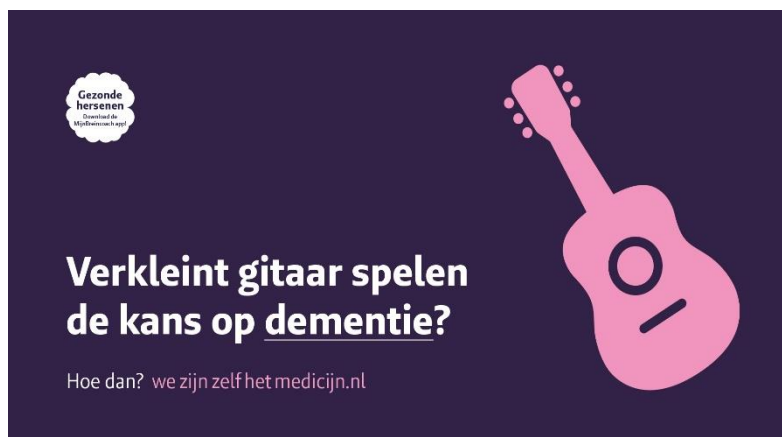

Dit is een campagne van Alzheimer Centrum Limburg i.s.m. vele partners.

*Campaign theme "Stay curious"*

*English translation: "Reduces playing guitar the risk of dementia?"*

## Supplementary File 2: The MijnBreincoach eHealth platform

The MijnBreincoach eHealth platform uses the LIBRA score to give people insight into their own dementia risk profile and flags individual room for lifestyle improvement. The LIBRA index consists of 12 modifiable risk and protective factors for dementia. Users start with a 12-item “quick test” that assesses the LIBRA factors and flags personal room for improvement based on self-reported data on the presence and/or absence of the specific LIBRA factor. Next, a user can create an account and complete the more comprehensive administration that assesses the 12 LIBRA factors with follow-up questions on the “quick test” by validated questionnaires. People can get insight and feedback on their personal risk profile, identify areas of healthy behaviour (to facilitate maintenance), areas of unhealthy behaviour (to facilitate change), and identify chronic vascular/metabolic conditions (to facilitate appropriate management). A user can choose a lifestyle topic or health condition of interest (smoking, alcohol use, cognitive activity, healthy diet, physical activity, obesity, hypertension, diabetes, coronary heart disease, chronic kidney disease, depression, or hypercholesterolemia) and receives daily notifications (“nut of the day”) on how to improve brain health by means of that factor.

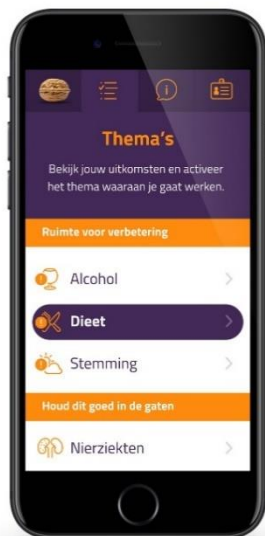

Personal profile with room for improvement

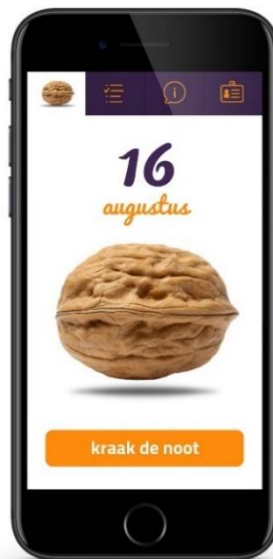

“Nut of the day”

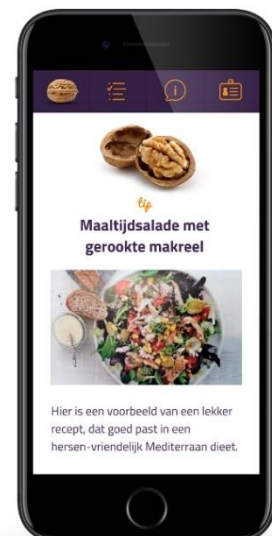

Short text message containing a recipe



### Supplementary File 3 - Dementia awareness questionnaire

#### Pre- and post-assessment:

---

#### Demographics

1. How old are you?  
*[text field for number between 40 and 75]*
  2. What is your gender?
    - Male
    - Female
  3. What is your zip code?  
*[text field of four numbers]*
  4. What is your marital status?
    - Married/registered partnership
    - Living together
    - Unmarried, never been married
    - Divorced
    - Widowed
  5. What is your highest finalized degree of education?  
*[Six categories according to the Dutch education system, categorized into low, medium and high]*
- 

#### Dementia knowledge

1. Dementia describes a set of symptoms including loss of memory, sudden mood swings, not remembering who people are, and having trouble finding your words. Alzheimer's disease is one form of dementia. How much would you say you know about dementia?
    - A great deal
    - Quite a lot
    - Some
    - Not very much
    - Nothing at all
    - I don't know
    - I prefer not to answer this question
-

1  
2  
3 Dementia risk awareness  
4

5 Please state how much you agree or disagree with the following statements.  
6

- 7 1. 'There is nothing anyone can do to reduce their risks of getting dementia'  
8      Agree strongly  
9      Agree  
10     Neither agree nor disagree  
11     Disagree  
12     Disagree strongly  
13
- 14 2. 'High blood pressure increases your chances of getting dementia'  
15      Agree strongly  
16      Agree  
17      Neither agree nor disagree  
18      Disagree  
19      Disagree strongly  
20  
21
- 22 3. 'Smoking increases your chances of getting dementia'  
23      Agree strongly  
24      Agree  
25      Neither agree nor disagree  
26      Disagree  
27      Disagree strongly  
28  
29
- 30 4. 'No or moderate alcohol use lowers your chances of getting dementia'  
31      Agree strongly  
32      Agree  
33      Neither agree nor disagree  
34      Disagree  
35      Disagree strongly  
36  
37
- 38 5. Regular physical activity lowers your chances of getting dementia'  
39      Agree strongly  
40      Agree  
41      Neither agree nor disagree  
42      Disagree  
43      Disagree strongly  
44
- 45 6. 'Depression increases the chances of getting dementia'  
46      Agree strongly  
47      Agree  
48      Neither agree nor disagree  
49      Disagree  
50      Disagree strongly  
51  
52
- 53 7. 'Diabetes increases the chances of getting dementia'  
54      Agree strongly  
55      Agree  
56  
57  
58  
59  
60

- 1  
2  
3                   ○ Neither agree nor disagree  
4                   ○ Disagree  
5                   ○ Disagree strongly  
6  
7  
8   8. 'Being overweight increases the chances of getting dementia'  
9                   ○ Agree strongly  
10                  ○ Agree  
11                  ○ Neither agree nor disagree  
12                  ○ Disagree  
13                  ○ Disagree strongly  
14  
15  
16   9. 'A mentally active lifestyle lowers the chances of getting dementia'  
17                  ○ Agree strongly  
18                  ○ Agree  
19                  ○ Neither agree nor disagree  
20                  ○ Disagree  
21                  ○ Disagree strongly  
22  
23   10. 'Heart disease increases the chances of getting dementia'  
24                  ○ Agree strongly  
25                  ○ Agree  
26                  ○ Neither agree nor disagree  
27                  ○ Disagree  
28                  ○ Disagree strongly  
29  
30  
31   11. 'Kidney disease increases the chances of getting dementia'  
32                  ○ Agree strongly  
33                  ○ Agree  
34                  ○ Neither agree nor disagree  
35                  ○ Disagree  
36                  ○ Disagree strongly  
37  
38   12. 'High cholesterol increases the chances of getting dementia'  
39                  ○ Agree strongly  
40                  ○ Agree  
41                  ○ Neither agree nor disagree  
42                  ○ Disagree  
43                  ○ Disagree strongly  
44  
45  
46   13. 'Healthy diet lowers the chances of getting dementia'  
47                  ○ Agree strongly  
48                  ○ Agree  
49                  ○ Neither agree nor disagree  
50                  ○ Disagree  
51                  ○ Disagree strongly  
52  
53  
54   14. Would you be interested in receiving information on how to improve your brain health?  
55                  ○ Yes  
56                  ○ No  
57  
58  
59  
60

- 1  
2  
3           ○ Maybe  
4

5           15. In the case that there was a mobile application, providing you without charge with information about your  
6 brain health en giving advice on how to improve your brain health, would you use this app?

- 7           ○ Yes  
8           ○ No  
9           ○ Maybe  
10

11 *[If answer is No, go to End]*

12 *[If answer is Yes or Maybe, go the question 16]*

13  
14  
15           16. Maastricht University has started a research line focused on prevention of dementia, in collaboration with  
16 the municipal health services. This research includes the development of an app (mobile application) that  
17 could give you more insight into your own brain health and how to improve your brain health. Would you  
18 be interested and do you give consent to be contacted for this research?

- 19           ○ Yes, I give consent  
20           ○ No, I give no consent  
21  
22

23 *[If answer is No, go to End]*

24 *[If answer is Yes, go to question 17]*

25  
26           17. Please leave the phone number and/or e-mail-address that we can use to contact you for this research.

27 *[Text field]*  
28  
29

30 **Extra items post-assessment:**

31 -----  
32

33  
34 Exposure to the campaign

35  
36           1. From March 2018 until January 2019, the Alzheimer Center Limburg ran a campaign focused on dementia  
37 prevention. Have you heard about this campaign?

- 38           ○ No  
39           ○ Yes  
40

41           2. Do you recognize the slogan “We are our own medicine”?

- 42           ○ No  
43           ○ Yes  
44

45           3. Have you heard about the MijnBreincoach (*MyBraincoach*) app? [*illustrative screenshot of the app*]

- 46           ○ No  
47           ○ Yes  
48

49           4. Via what sources have you heard or seen something about prevention of dementia during the last year?  
50 Select all that apply.

- 51           ▪ Television  
52           ▪ Radio  
53           ▪ Newspaper  
54           ▪ Advertisement on bus shelter  
55  
56  
57

- 1  
2  
3       ▪ Website of this campaign  
4       ▪ Social media  
5       ▪ Campaign activity, such as a workshop or presentation  
6       ○ I have not heard or seen something of this kind during the last year  
7       ▪ Other source [*open text field*]  
8  
9
- 10   5. Have you seen these campaign materials during the last year? [*illustrative screenshots*]  
11       ▪ Campaign flyer [yes/no]  
12       ▪ Campaign poster [yes/no]  
13       ▪ Bus shelter advertisement [yes/no]  
14       ▪ Vaccine boxes [yes/no]  
15
- 16   6. Have you adopted a more healthy lifestyle during the last year? If yes, what specific changes have you  
17   made? Select all that apply.  
18       ○ I have not adopted a more healthy lifestyle during the last year  
19       ▪ Eat more healthy  
20       ▪ Exercise more  
21       ▪ Consume less alcohol or stop drinking alcohol  
22       ▪ Smoke less or stop smoking cigarettes  
23       ▪ Be mentally more active  
24       ▪ More relaxation or more adequate coping for depressive complaints  
25       ▪ Monitor my glucose levels  
26       ▪ Monitor my weight  
27       ▪ Lowering my blood pressure  
28       ▪ Monitor my kidney function  
29       ▪ Monitor my heart condition  
30       ▪ Other: [*open text field*]  
31  
32
- 33   7. Did you adopt a more healthy lifestyle during the last year in order to improve your brain health?  
34       ○ No  
35       ○ Yes  
36  
37
- 38   8. Would you say that you have become more conscious of your brain health and the relationship of your  
39   brain health with your lifestyle over the last year?  
40       ○ No  
41       ○ Yes  
42  
43
- 

44  
45 End

46  
47 Thank you very much for filling in this questionnaire. If you have any remarks or questions regarding this study,  
48 please contact us via [*email address*].  
49  
50  
51  
52  
53  
54  
55  
56  
57

1  
2  
3  
4  
5  
6  
7  
8  
9  
10  
11  
12  
13  
14  
15  
16  
17  
18  
19  
20  
21  
22  
23  
24  
25  
26  
27  
28  
29  
30  
31  
32  
33  
34  
35  
36  
37  
38  
39  
40  
41  
42  
43  
44  
45  
46  
47

### Supplementary File 4. Flowchart of the population pre- and post-assessment

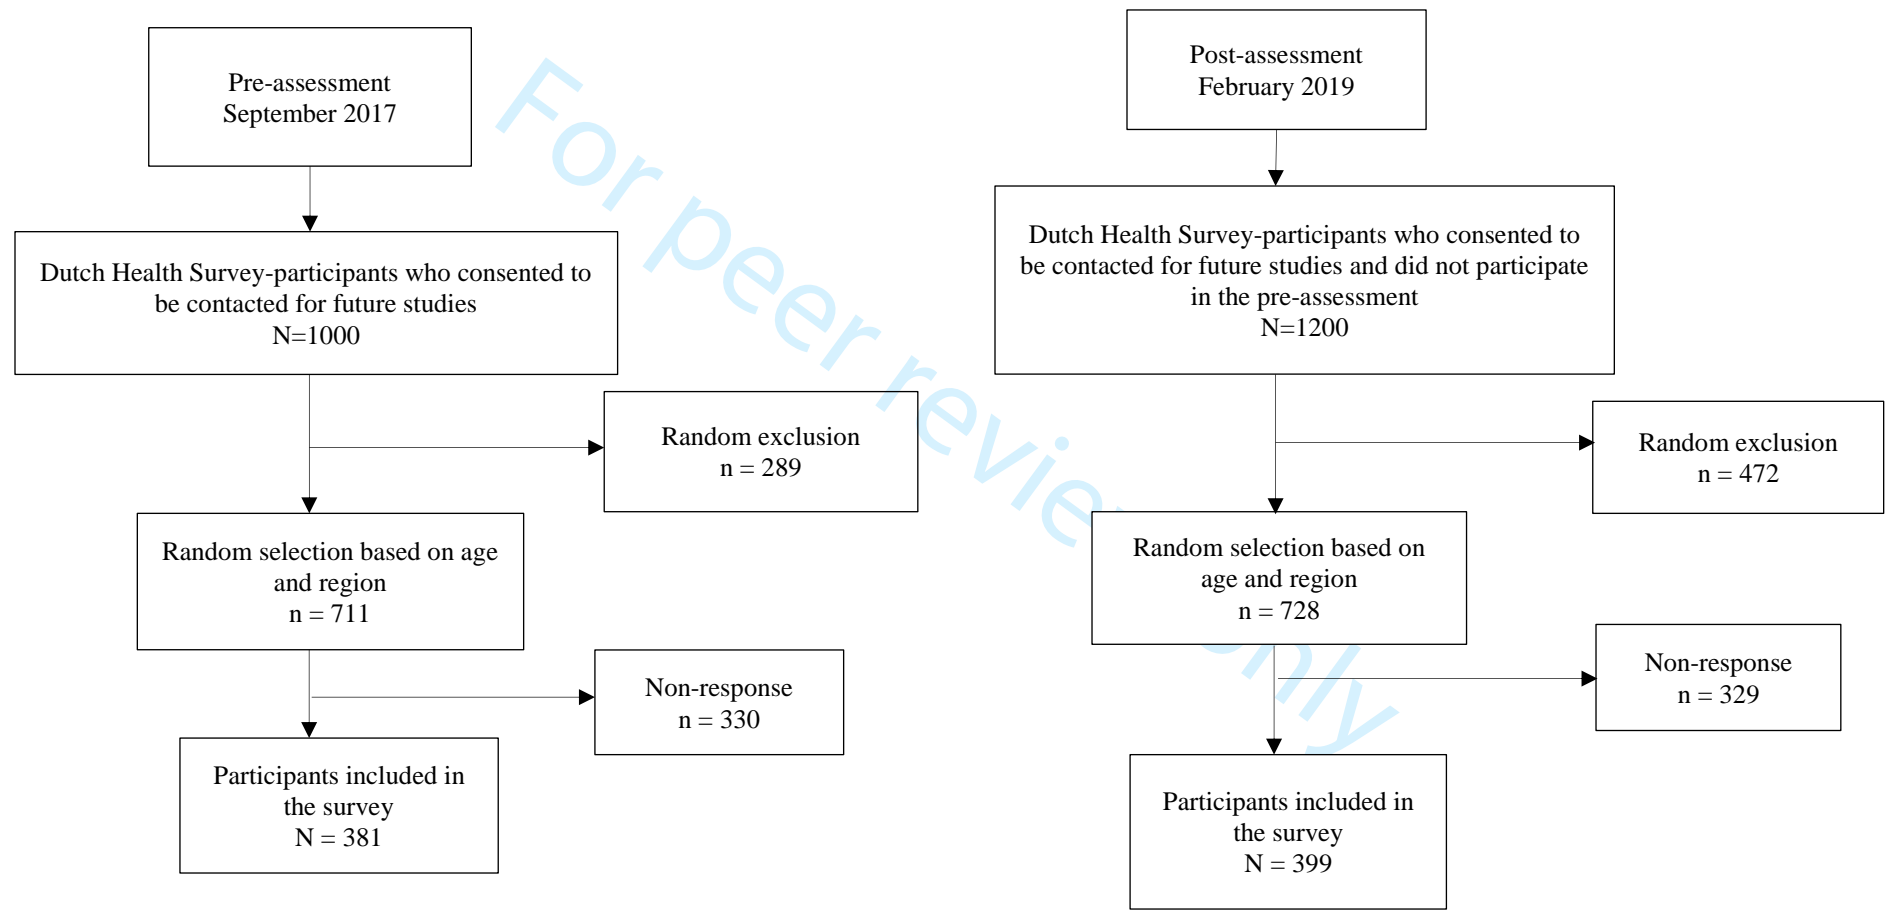

Supplementary File 5a. Flowchart of the district pre-assessment

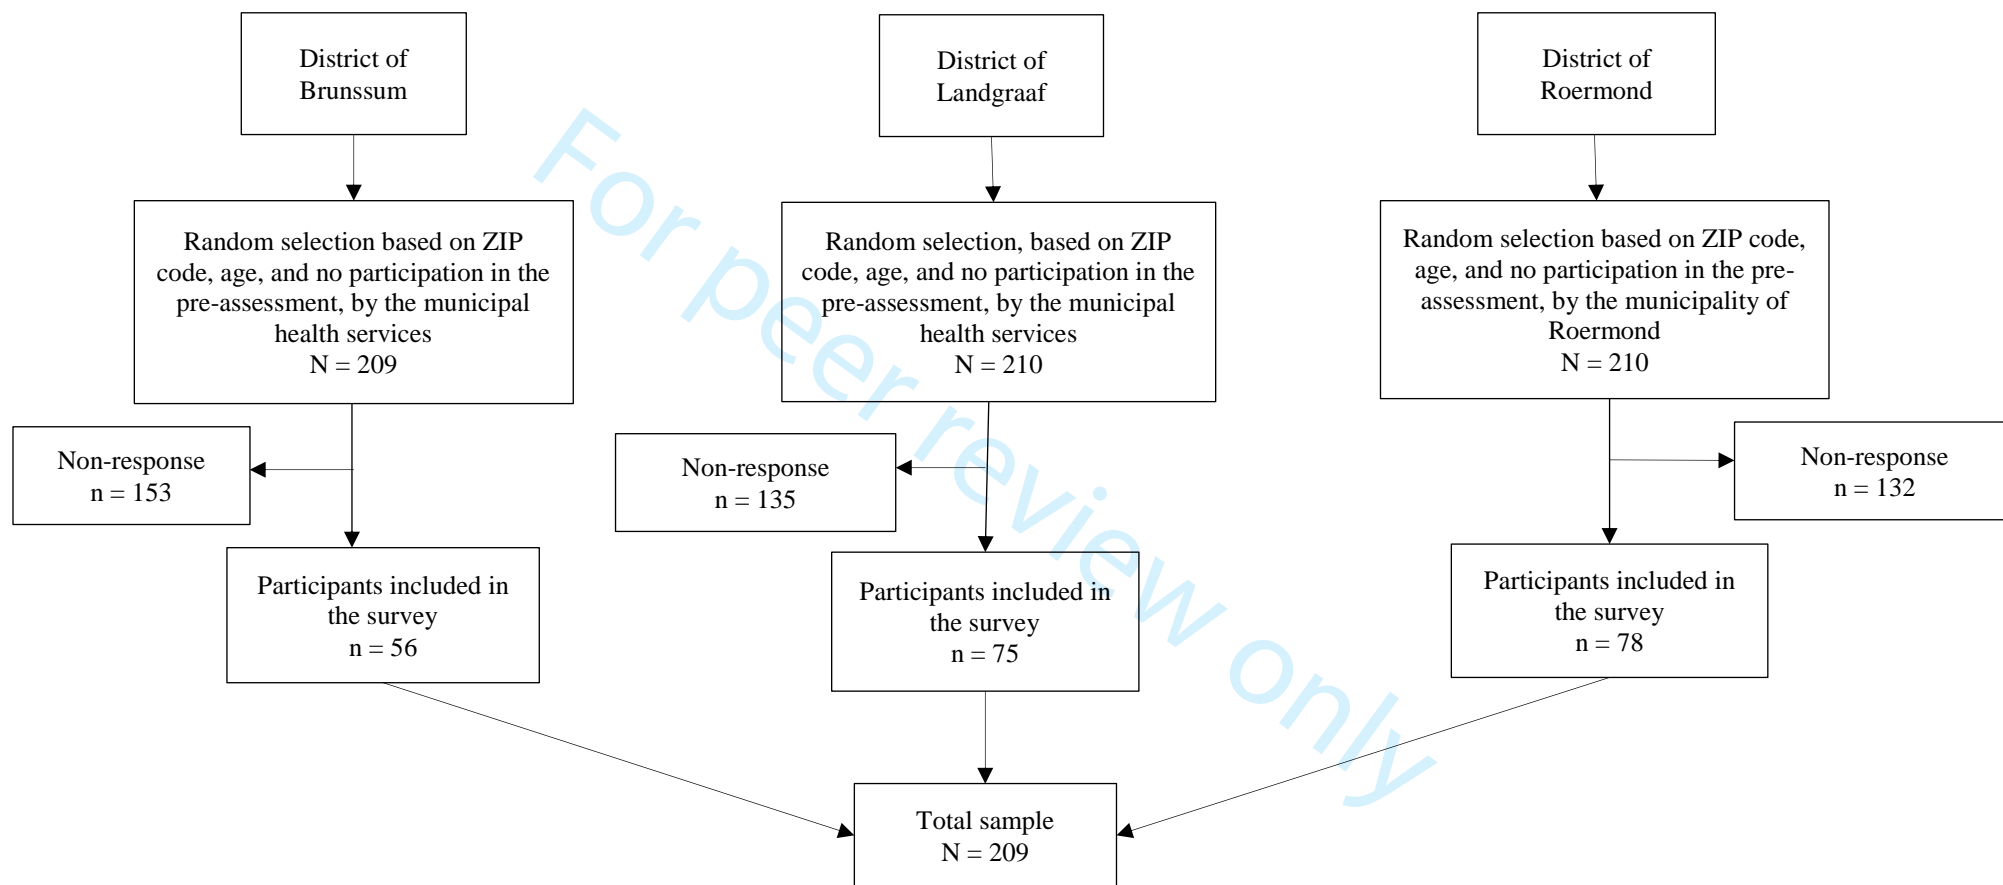

Supplementary File 5b. Flowchart of the district post-assessment

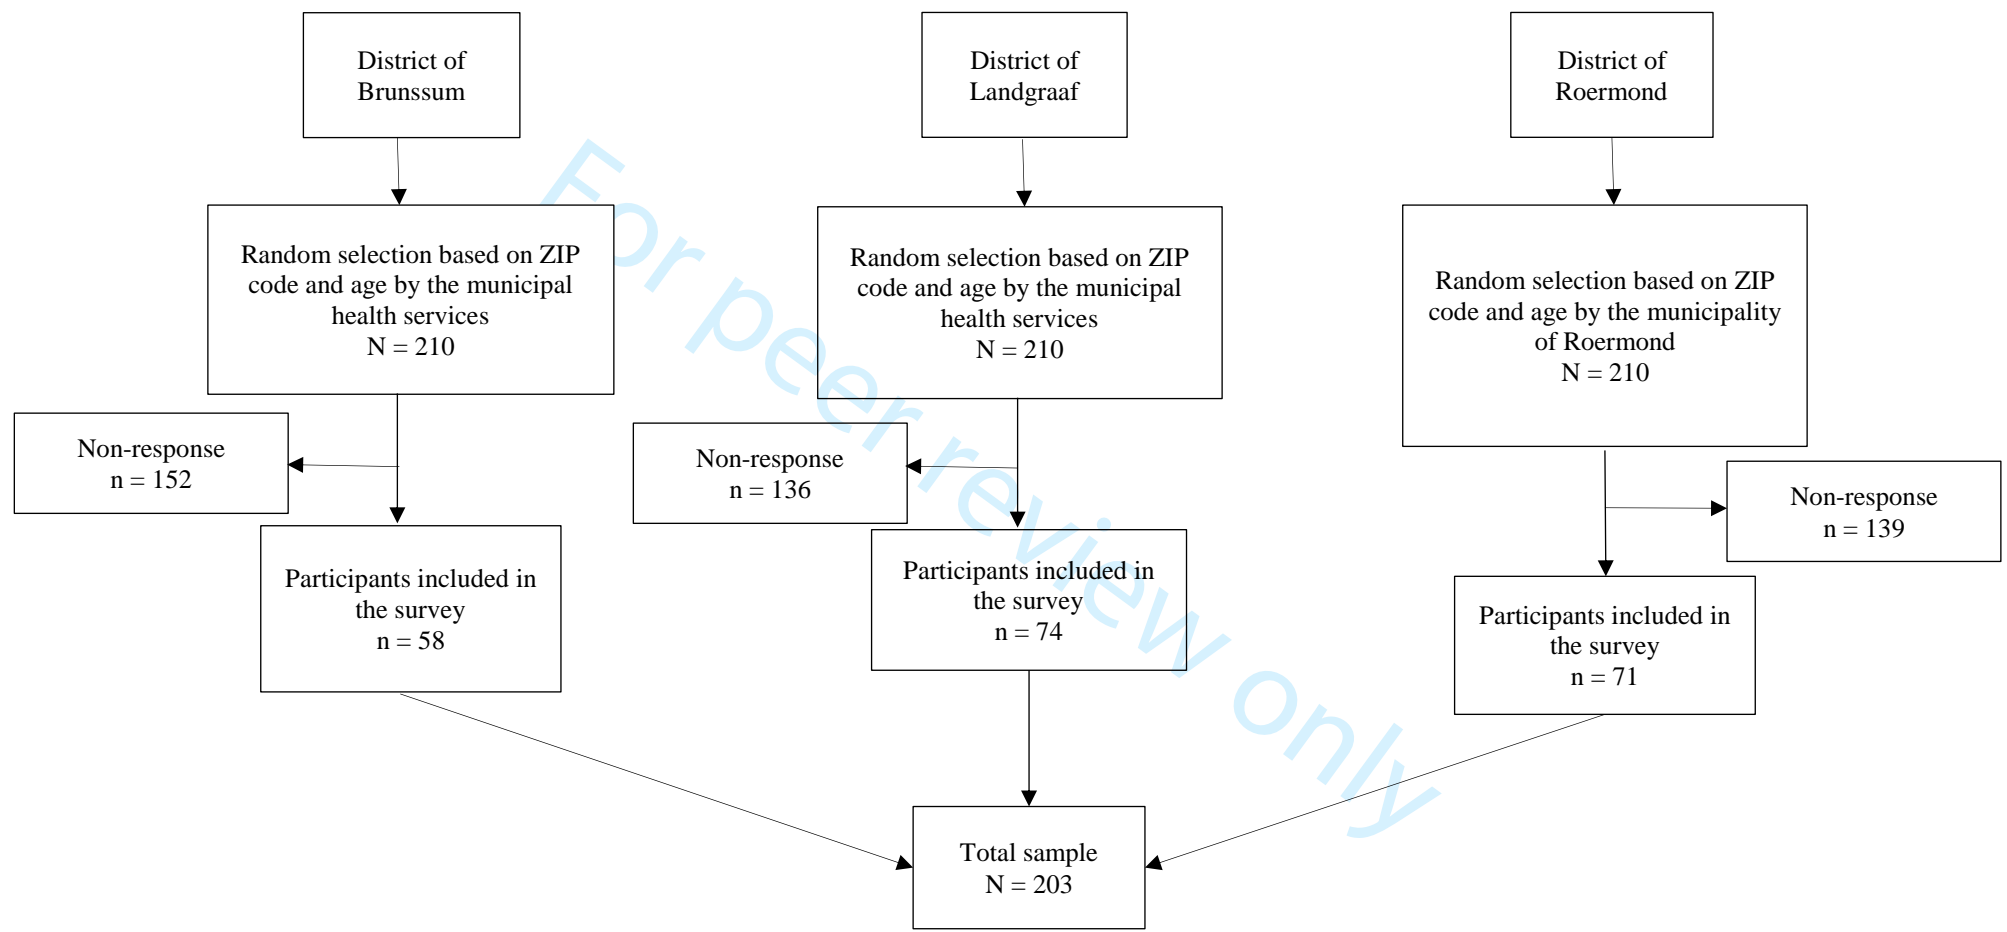



## Supplementary File 6. Characteristics of the three districts before and after the campaign

| Variables*                       | District of Roermond (n = 149) |                      |         | District of Landgraaf (n = 149) |                      |         | District of Brunssum (n = 114) |                      |         |
|----------------------------------|--------------------------------|----------------------|---------|---------------------------------|----------------------|---------|--------------------------------|----------------------|---------|
|                                  | Pre-campaign (n=78)            | Post-campaign (n=71) | p-value | Pre-campaign (n=75)             | Post-campaign (n=74) | p-value | Pre-campaign (n=56)            | Post-campaign (n=58) | p-value |
| <b>Age, mean (SD)</b>            | 56.9 (8.7)                     | 55.4 (7.1)           | 0.247   | 60.9 (7.7)                      | 59.1 (8.6)           | 0.177   | 63.3 (8.1)                     | 57.7 (8.8)           | < 0.001 |
| <b>Age group (year), n (%)</b>   |                                |                      | 0.222   |                                 |                      | 0.241   |                                |                      | 0.013   |
| 40 – 49                          | 19 (24.4%)                     | 17 (23.9%)           |         | 4 (5.6%)                        | 12 (16.2%)           |         | 4 (7.3%)                       | 10 (17.2%)           |         |
| 50 – 59                          | 30 (38.5%)                     | 29 (40.9%)           |         | 25 (35.2%)                      | 22 (29.7%)           |         | 14 (25.5%)                     | 26 (44.8%)           |         |
| 60 – 69                          | 22 (28.2%)                     | 24 (33.8%)           |         | 33 (46.5%)                      | 31 (41.9%)           |         | 24 (43.6%)                     | 17 (29.3%)           |         |
| 70 – 75                          | 7 (9.0%)                       | 1 (1.4%)             |         | 9 (12.7%)                       | 9 (12.2%)            |         | 13 (23.6%)                     | 5 (8.6%)             |         |
| <b>Female, n (%)</b>             | 39 (50.0%)                     | 41 (57.8%)           | 0.344   | 38 (50.7%)                      | 37 (50.0%)           | 0.935   | 28 (50.0%)                     | 31 (53.5%)           | 0.713   |
| <b>Marital status, n (%)</b>     |                                |                      | 0.144   |                                 |                      | 0.875   |                                |                      | 0.972   |
| <i>Married/living together</i>   | 66 (84.6%)                     | 49 (69.0%)           |         | 64 (85.3%)                      | 64 (86.5%)           |         | 42 (75.0%)                     | 44 (75.9%)           |         |
| <i>Not/never been married</i>    | 4 (5.1%)                       | 7 (9.9%)             |         | 4 (5.3%)                        | 4 (5.4%)             |         | 4 (7.1%)                       | 5 (8.6%)             |         |
| <i>Divorced</i>                  | 5 (6.4%)                       | 11 (15.5%)           |         | 5 (6.7%)                        | 3 (4.1%)             |         | 5 (8.9%)                       | 4 (6.9%)             |         |
| <i>Widowed</i>                   | 3 (3.9%)                       | 4 (5.6%)             |         | 2 (2.7%)                        | 3 (4.1%)             |         | 5 (8.9%)                       | 5 (8.6%)             |         |
| <b>Educational level†, n (%)</b> |                                |                      | 0.725   |                                 |                      | 0.996   |                                |                      | 0.985   |
| <i>Low</i>                       | 18 (23.1%)                     | 13 (18.3%)           |         | 15 (20.0%)                      | 15 (20.3%)           |         | 22 (39.3%)                     | 22 (37.9%)           |         |

1  
2  
3  
4  
5  
6  
7  
8  
9  
10  
11  
12  
13  
14  
15  
16  
17  
18  
19  
20  
21  
22  
23  
24  
25  
26  
27  
28  
29  
30  
31  
32  
33  
34  
35  
36  
37  
38  
39  
40  
41  
42  
43  
44  
45  
46  
47

|                                                   |            |            |            |            |            |            |
|---------------------------------------------------|------------|------------|------------|------------|------------|------------|
| <i>Middle</i>                                     | 32 (41.0%) | 29 (40.9%) | 33 (44.0%) | 32 (43.2%) | 23 (41.1%) | 24 (41.4%) |
| <i>High</i>                                       | 28 (35.9%) | 29 (40.9%) | 27 (36.0%) | 27 (36.5%) | 11 (19.6%) | 12 (20.7%) |
| <b>Self-reported knowledge of dementia, n (%)</b> |            | 0.186      |            | 0.475      |            | 0.634      |
| <i>Good</i>                                       | 72 (92.3%) | 59 (85.5%) | 65 (86.7%) | 66 (90.4%) | 44 (78.6%) | 46 (82.1%) |
| <i>Insufficient</i>                               | 6 (7.7%)   | 10 (14.5%) | 10 (13.3%) | 7 (9.6%)   | 12 (21.4%) | 10 (17.9%) |

---

Abbreviations: SD: standard deviation; n: amount of people; \* Maximum value does not count up due to missing values; † Self-reported highest finalized degree, divided into low (primary school or low vocational education), middle (intermediate secondary education or intermediate vocational or higher secondary education) and high (higher vocational education or university).

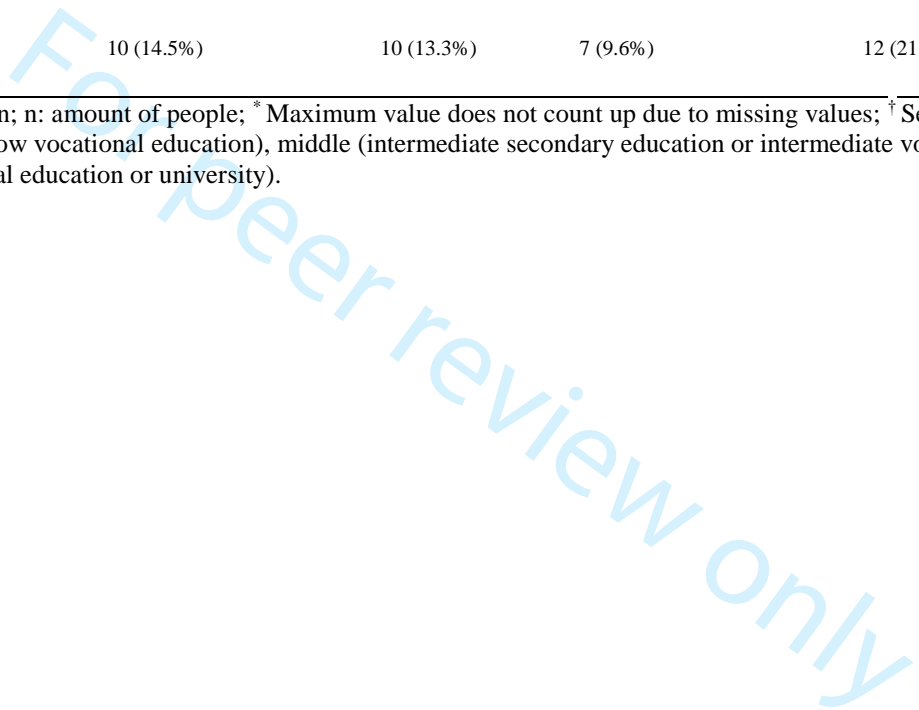

**STROBE 2007 (v4) Statement—Checklist of items that should be included in reports of *cross-sectional studies***

| Section/Topic                | Item # | Recommendation                                                                                                                                                                       | Reported on page # |
|------------------------------|--------|--------------------------------------------------------------------------------------------------------------------------------------------------------------------------------------|--------------------|
| <b>Title and abstract</b>    | 1      | (a) Indicate the study's design with a commonly used term in the title or the abstract                                                                                               | 1 and 2            |
|                              |        | (b) Provide in the abstract an informative and balanced summary of what was done and what was found                                                                                  | 2                  |
| <b>Introduction</b>          |        |                                                                                                                                                                                      |                    |
| Background/rationale         | 2      | Explain the scientific background and rationale for the investigation being reported                                                                                                 | 4 and 5            |
| Objectives                   | 3      | State specific objectives, including any prespecified hypotheses                                                                                                                     | 6                  |
| <b>Methods</b>               |        |                                                                                                                                                                                      |                    |
| Study design                 | 4      | Present key elements of study design early in the paper                                                                                                                              | 6-8                |
| Setting                      | 5      | Describe the setting, locations, and relevant dates, including periods of recruitment, exposure, follow-up, and data collection                                                      | 6-8                |
| Participants                 | 6      | (a) Give the eligibility criteria, and the sources and methods of selection of participants                                                                                          | 6-7                |
| Variables                    | 7      | Clearly define all outcomes, exposures, predictors, potential confounders, and effect modifiers. Give diagnostic criteria, if applicable                                             | 8-9                |
| Data sources/<br>measurement | 8*     | For each variable of interest, give sources of data and details of methods of assessment (measurement). Describe comparability of assessment methods if there is more than one group | 8                  |
| Bias                         | 9      | Describe any efforts to address potential sources of bias                                                                                                                            | 8-9                |
| Study size                   | 10     | Explain how the study size was arrived at                                                                                                                                            |                    |
| Quantitative variables       | 11     | Explain how quantitative variables were handled in the analyses. If applicable, describe which groupings were chosen and why                                                         | 8-9                |
| Statistical methods          | 12     | (a) Describe all statistical methods, including those used to control for confounding                                                                                                | 8-9                |
|                              |        | (b) Describe any methods used to examine subgroups and interactions                                                                                                                  | 8-9                |
|                              |        | (c) Explain how missing data were addressed                                                                                                                                          | n.a.               |
|                              |        | (d) If applicable, describe analytical methods taking account of sampling strategy                                                                                                   | n.a.               |
|                              |        | (e) Describe any sensitivity analyses                                                                                                                                                | n.a.               |
| <b>Results</b>               |        |                                                                                                                                                                                      |                    |

|                          |     |                                                                                                                                                                                                              |                                |
|--------------------------|-----|--------------------------------------------------------------------------------------------------------------------------------------------------------------------------------------------------------------|--------------------------------|
| Participants             | 13* | (a) Report numbers of individuals at each stage of study—eg numbers potentially eligible, examined for eligibility, confirmed eligible, included in the study, completing follow-up, and analysed            | 9                              |
|                          |     | (b) Give reasons for non-participation at each stage                                                                                                                                                         | n.a.                           |
|                          |     | (c) Consider use of a flow diagram                                                                                                                                                                           | Supplemental File 4, 5a and 5b |
| Descriptive data         | 14* | (a) Give characteristics of study participants (eg demographic, clinical, social) and information on exposures and potential confounders                                                                     | 10-11                          |
|                          |     | (b) Indicate number of participants with missing data for each variable of interest                                                                                                                          | n.a.                           |
| Outcome data             | 15* | Report numbers of outcome events or summary measures                                                                                                                                                         | 13                             |
| Main results             | 16  | (a) Give unadjusted estimates and, if applicable, confounder-adjusted estimates and their precision (eg, 95% confidence interval). Make clear which confounders were adjusted for and why they were included | 13                             |
|                          |     | (b) Report category boundaries when continuous variables were categorized                                                                                                                                    | 13-14                          |
|                          |     | (c) If relevant, consider translating estimates of relative risk into absolute risk for a meaningful time period                                                                                             | n.a.                           |
| Other analyses           | 17  | Report other analyses done—eg analyses of subgroups and interactions, and sensitivity analyses                                                                                                               | 13-15                          |
| <b>Discussion</b>        |     |                                                                                                                                                                                                              |                                |
| Key results              | 18  | Summarise key results with reference to study objectives                                                                                                                                                     | 16                             |
| Limitations              | 19  | Discuss limitations of the study, taking into account sources of potential bias or imprecision. Discuss both direction and magnitude of any potential bias                                                   | 17                             |
| Interpretation           | 20  | Give a cautious overall interpretation of results considering objectives, limitations, multiplicity of analyses, results from similar studies, and other relevant evidence                                   | 16-17                          |
| Generalisability         | 21  | Discuss the generalisability (external validity) of the study results                                                                                                                                        | 17-18                          |
| <b>Other information</b> |     |                                                                                                                                                                                                              |                                |
| Funding                  | 22  | Give the source of funding and the role of the funders for the present study and, if applicable, for the original study on which the present article is based                                                | 19                             |

\*Give information separately for cases and controls in case-control studies and, if applicable, for exposed and unexposed groups in cohort and cross-sectional studies.

**Note:** An Explanation and Elaboration article discusses each checklist item and gives methodological background and published examples of transparent reporting. The STROBE checklist is best used in conjunction with this article (freely available on the Web sites of PLoS Medicine at <http://www.plosmedicine.org/>, Annals of Internal Medicine at <http://www.annals.org/>, and Epidemiology at <http://www.epidem.com/>). Information on the STROBE Initiative is available at [www.strobe-statement.org](http://www.strobe-statement.org).
